# Supplementary material
Source: MDPI journal article supplement (https://www.mdpi.com/1999-4907/13/1/108)
Supplement: s1 [file s1]

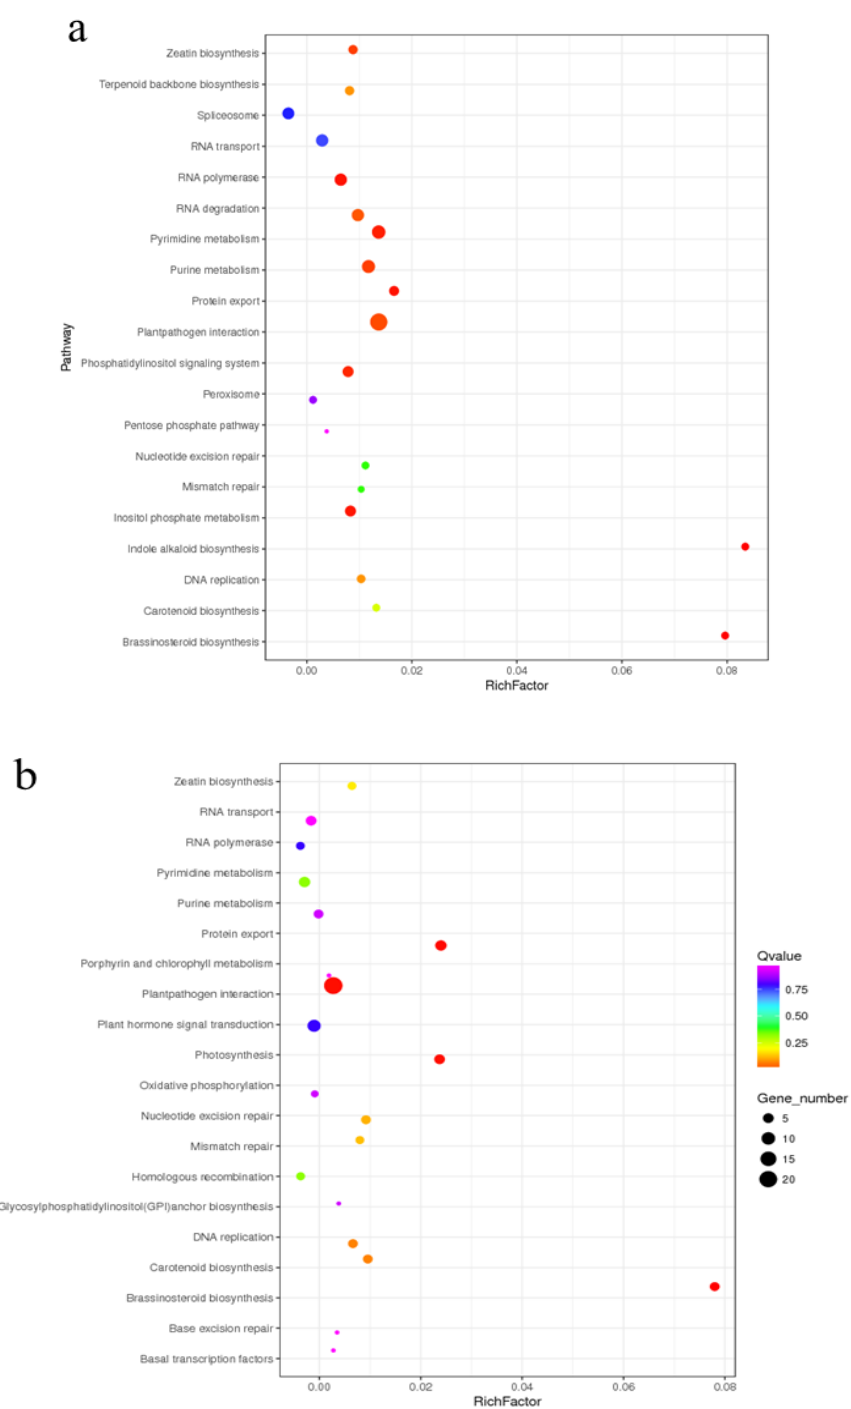

Supplementary Figure S4. Top 20 KEGG enrichment pathways of target genes in July/May (a) and September/July (b) from *Gleditsia sinensis* pods.
