# Supplementary material
Source: MDPI journal article supplement (https://www.mdpi.com/1999-4907/13/1/108)
Supplement: s1 [file s1]

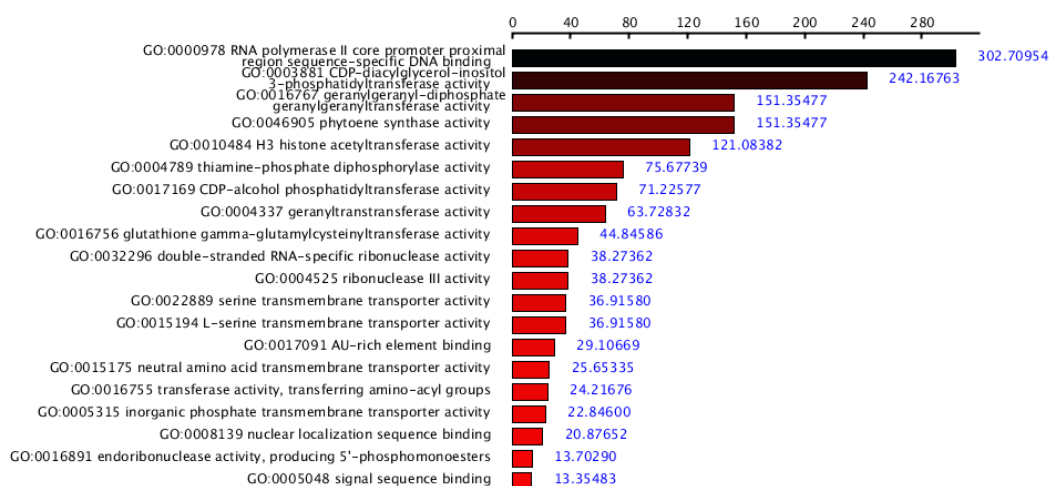

### May vs Jul (molecular function)

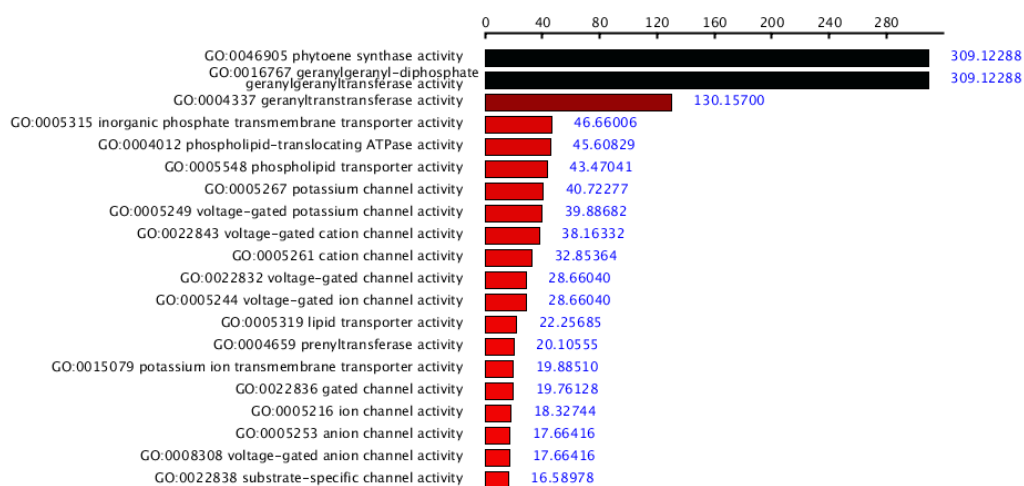

### Jul vs Sep (molecular function)

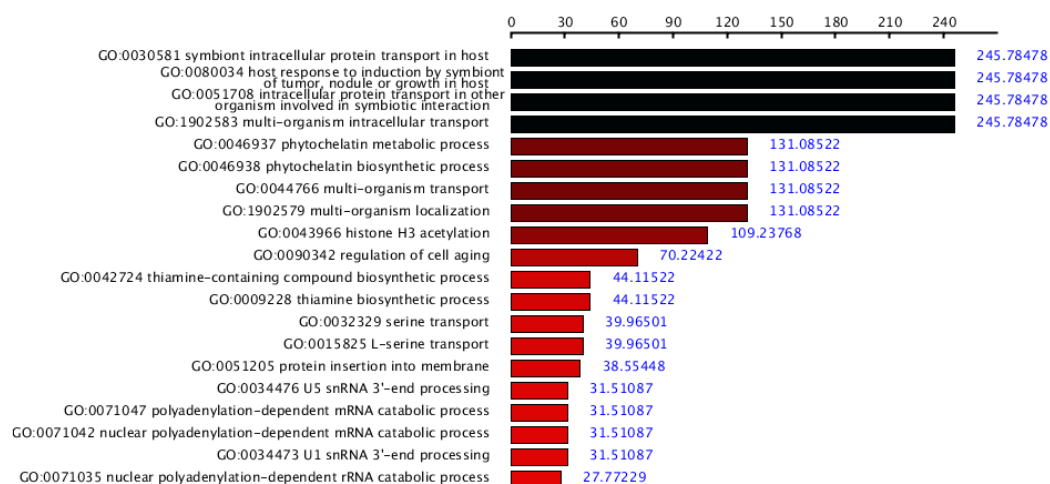

### May vs Jul (biological process)

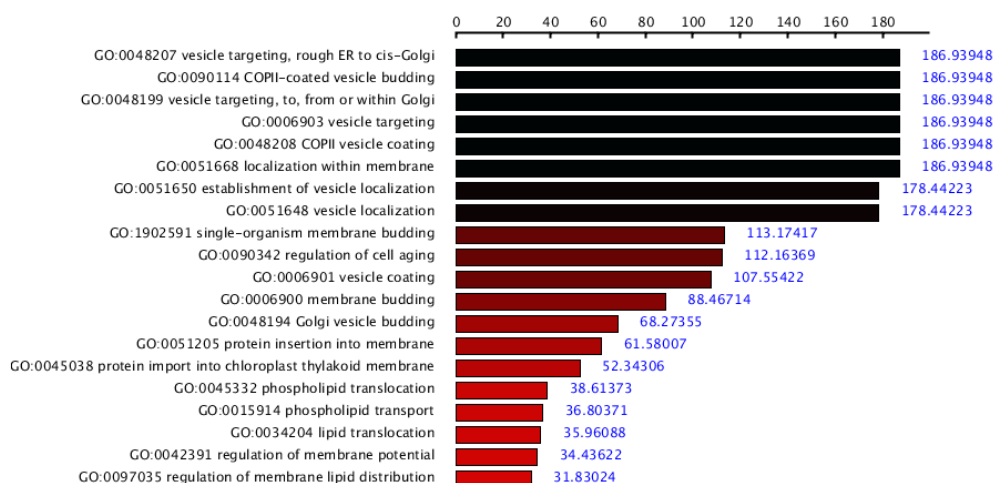

### Jul vs Sep (biological process)

Supplementary Figure S3. GO enrichment of target genes in May vs. July and July vs. September.
