# Supplementary material
Source: MDPI journal article supplement (https://www.mdpi.com/1999-4907/13/1/108)
Supplement: s1 [file s1]

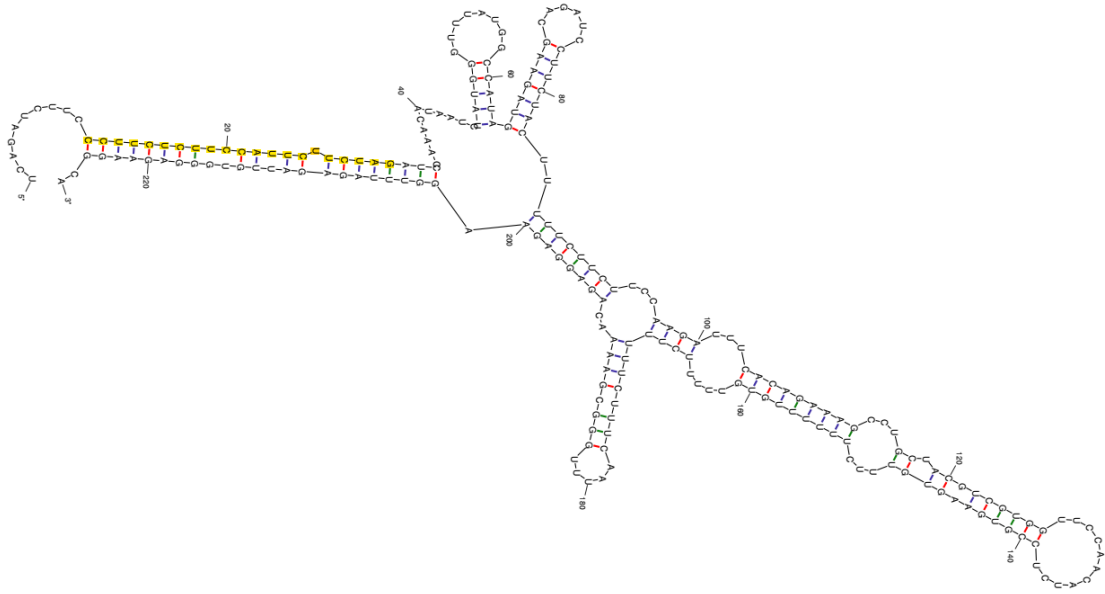

gsi-smR1

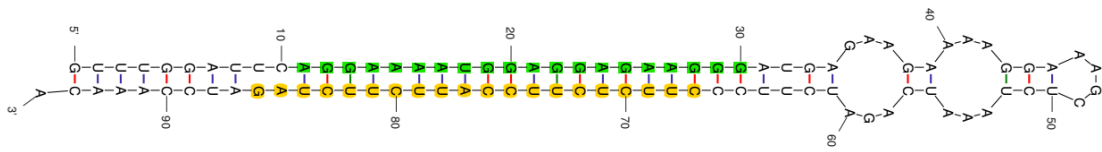

gsi-smR2

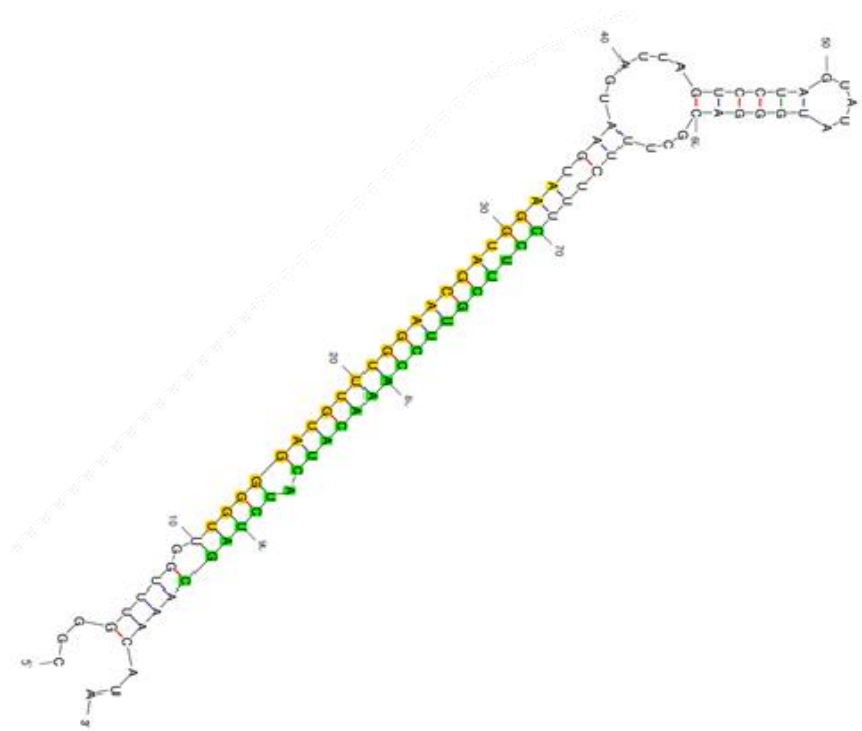

gsi-smR3

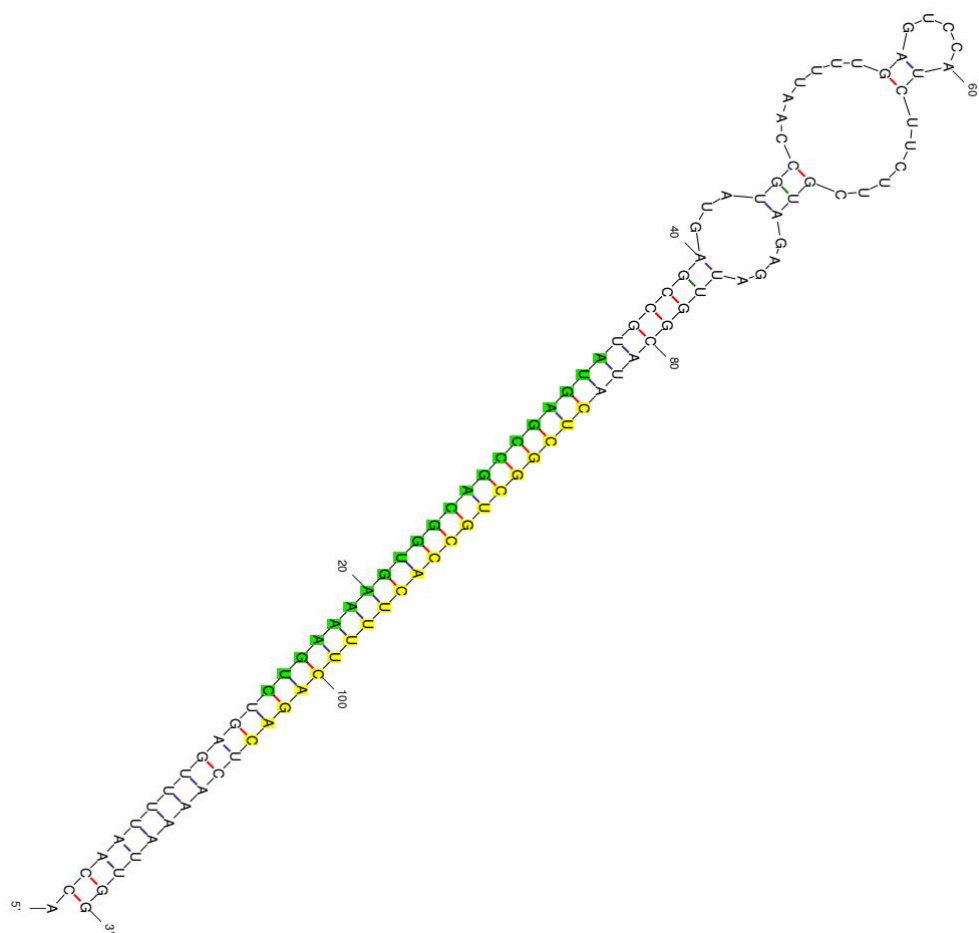

gsi-smR4

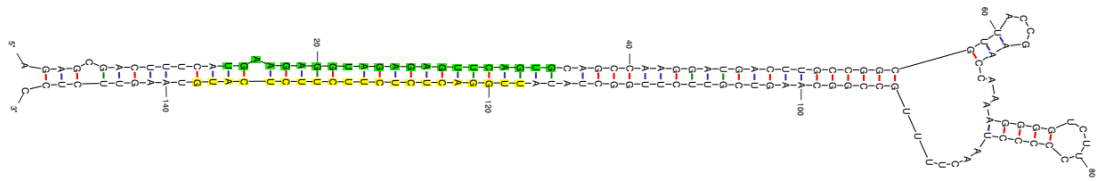

gsi-smR5

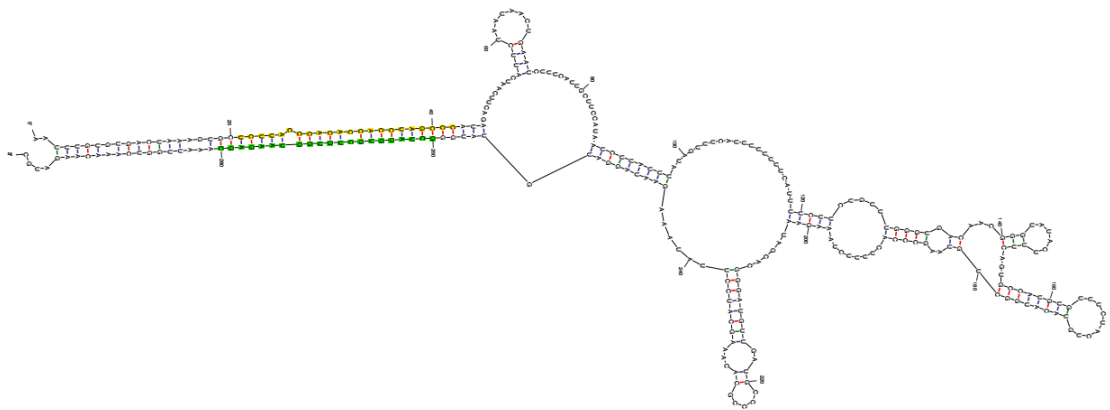

gsi-smR6

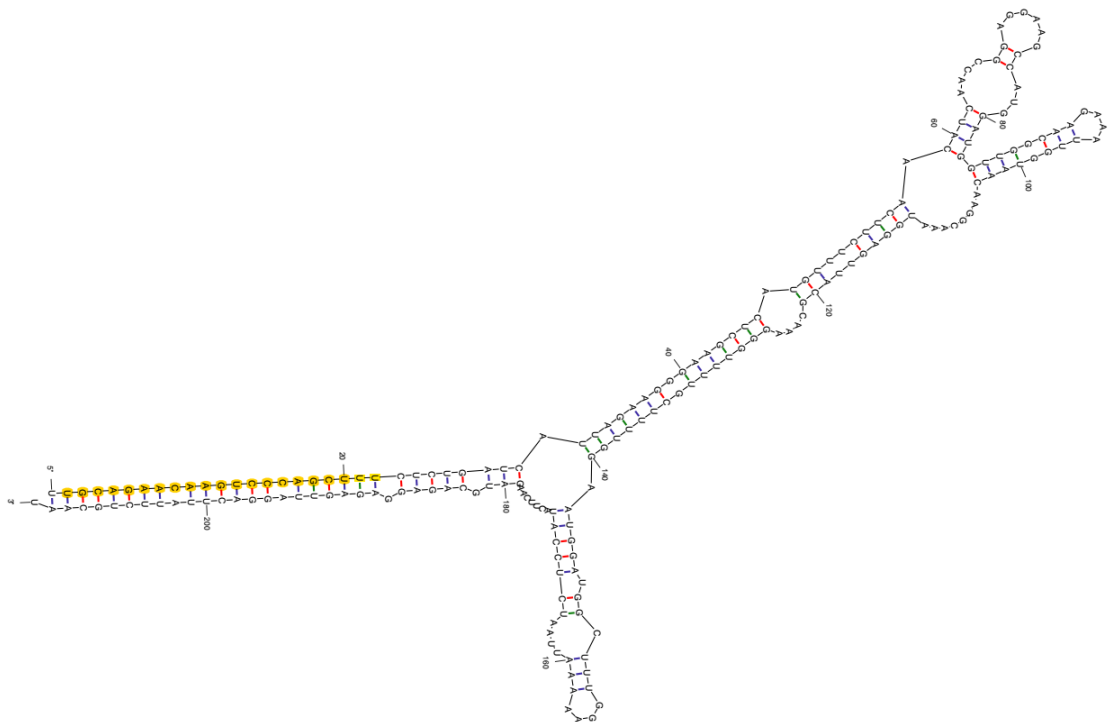

gsi-smR7

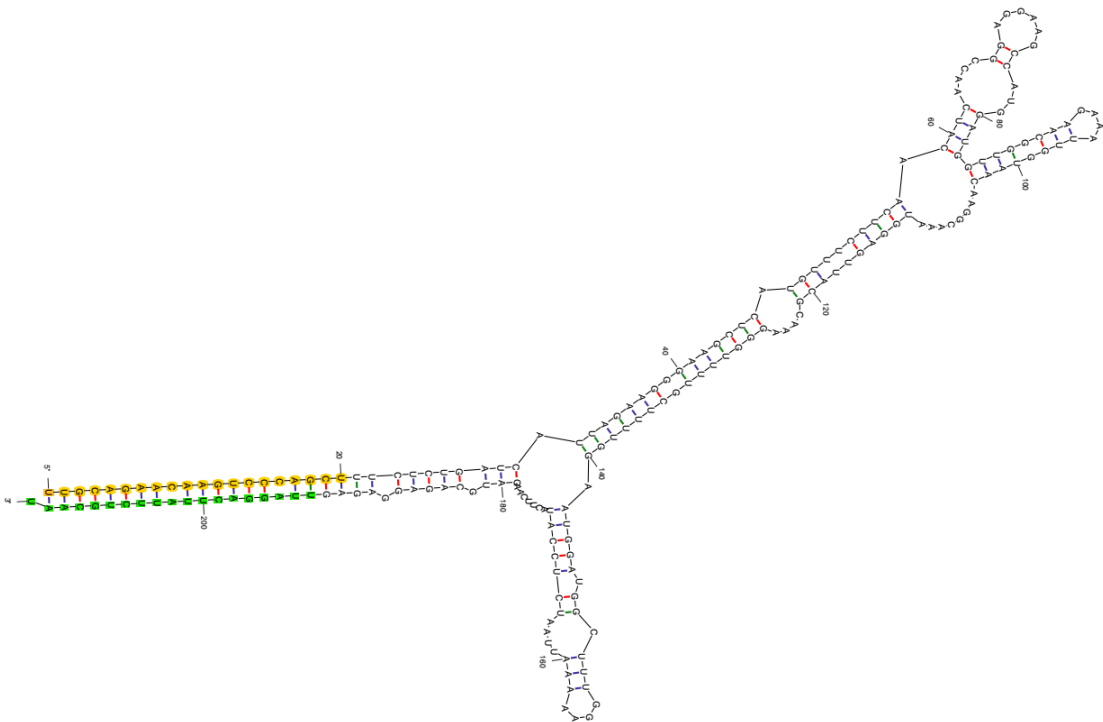

gsi-smR8

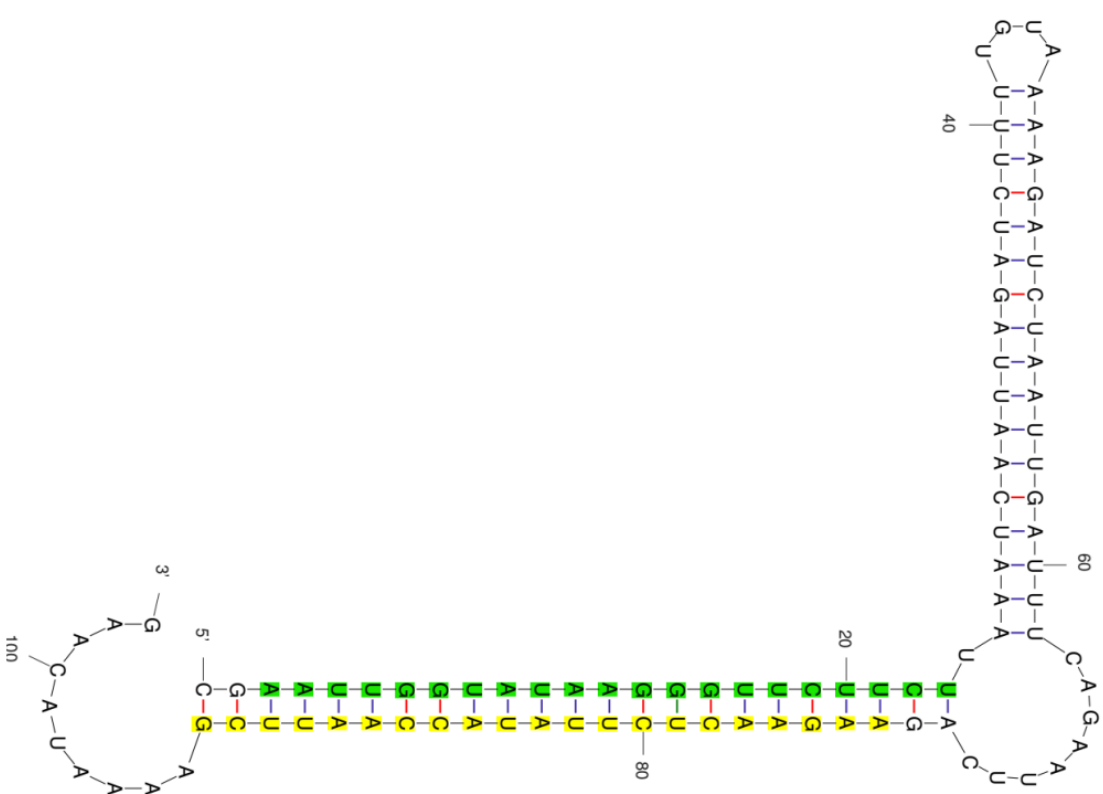

gsi-smR9

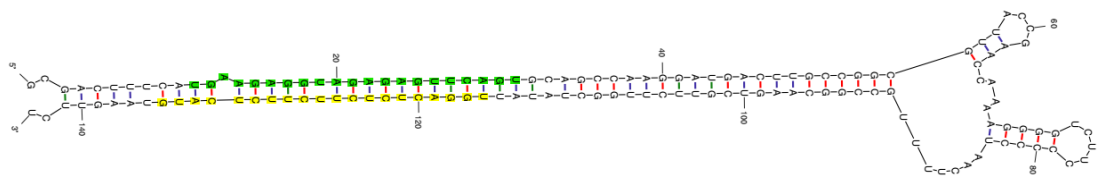

gsi-smR10

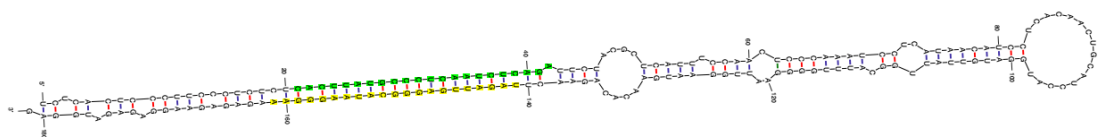

gsi-smR11

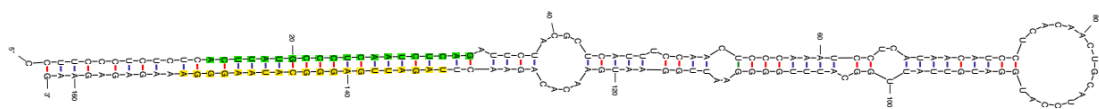

gsi-smR12

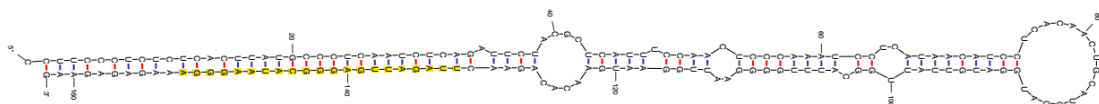

gsi-smR13

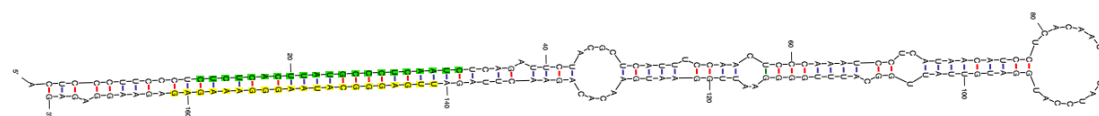

gsi-smR14

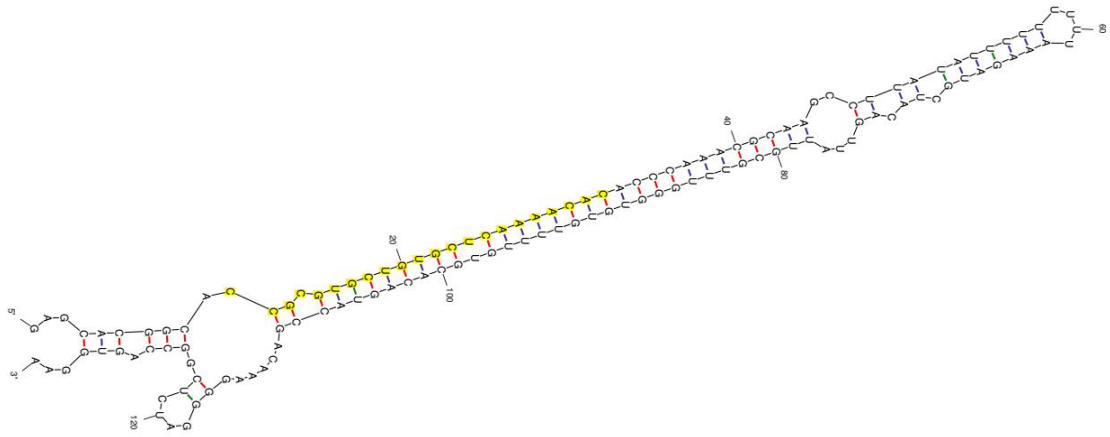

gsi-smR15

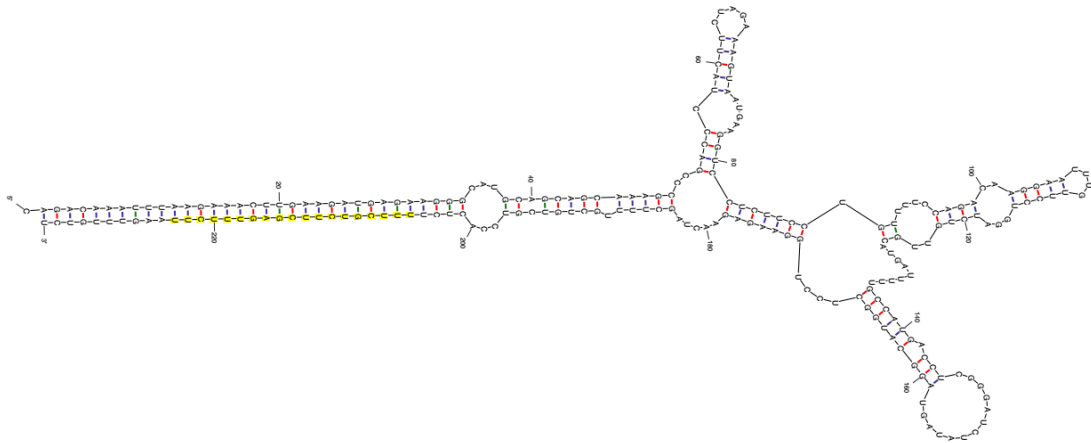

gsi-smR16

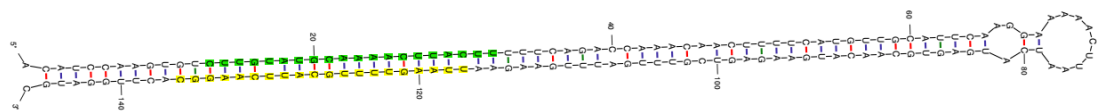

gsi-smR17

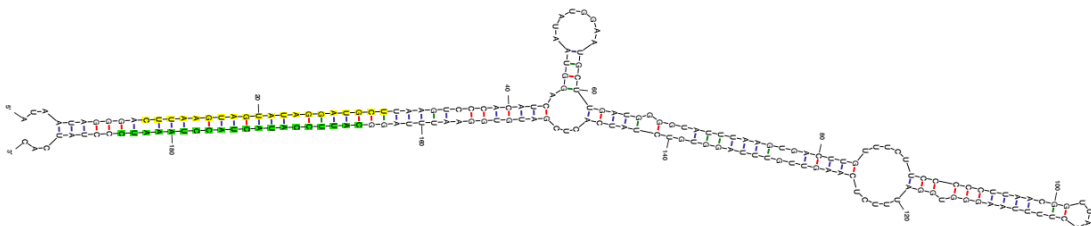

gsi-smR18

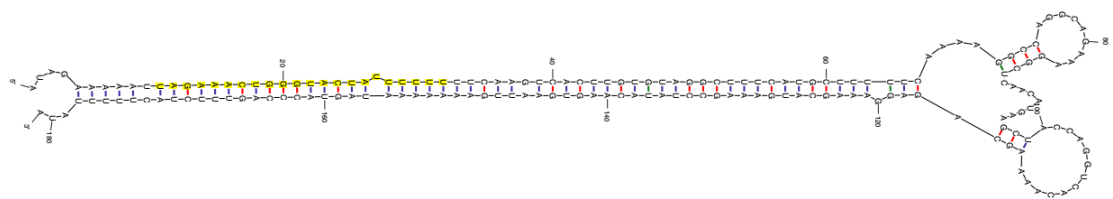

gsi-smR19

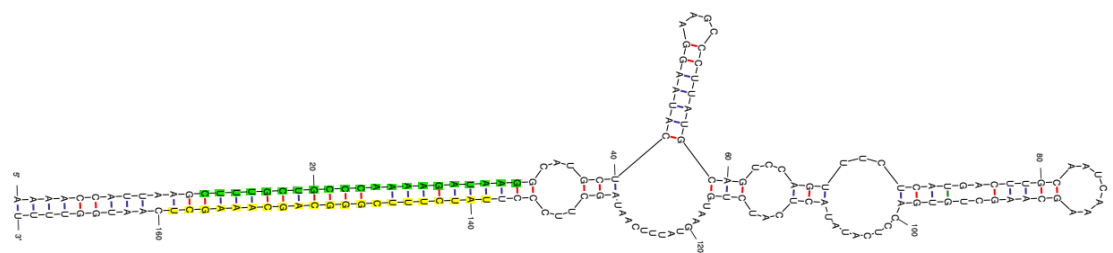

gsi-smR20

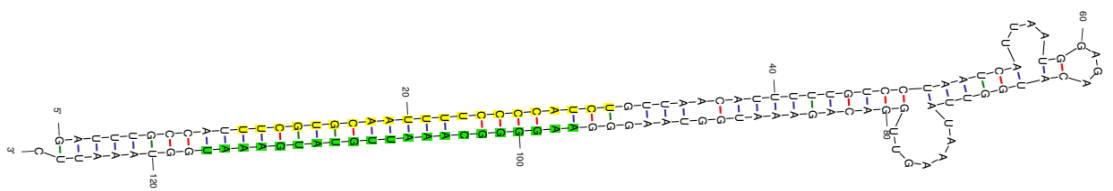

gsi-smR21

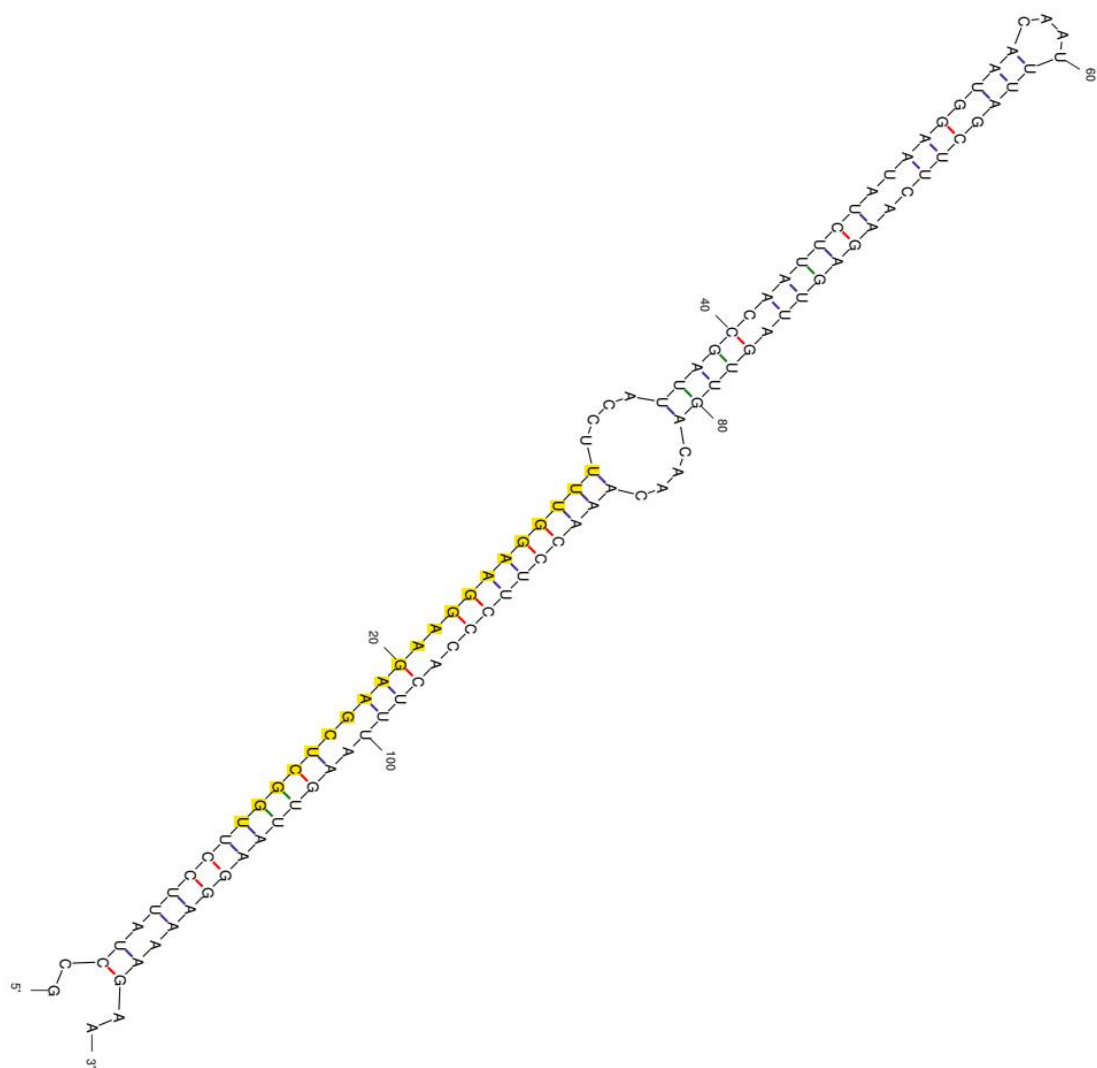

gsi-smR22



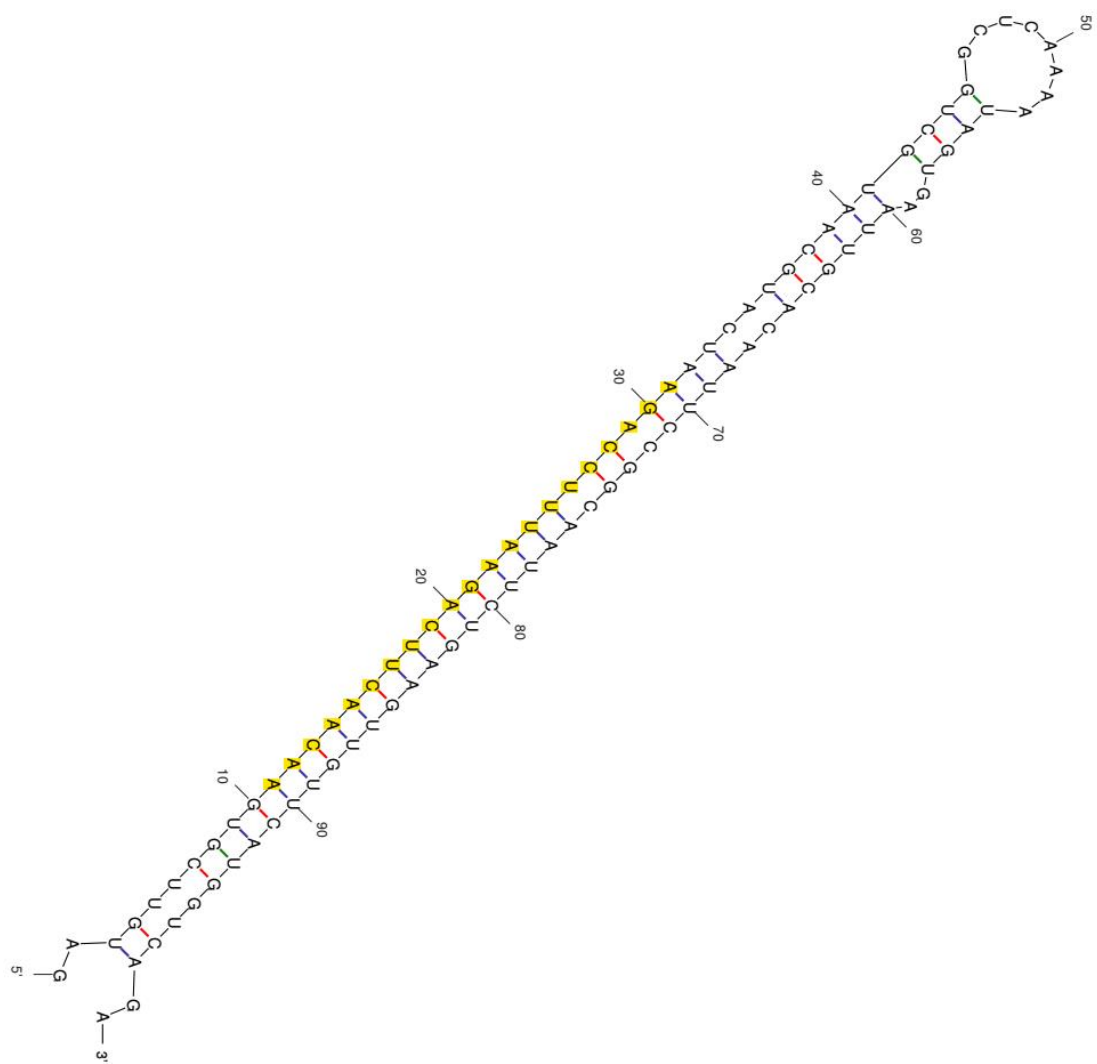

gsi-smR23

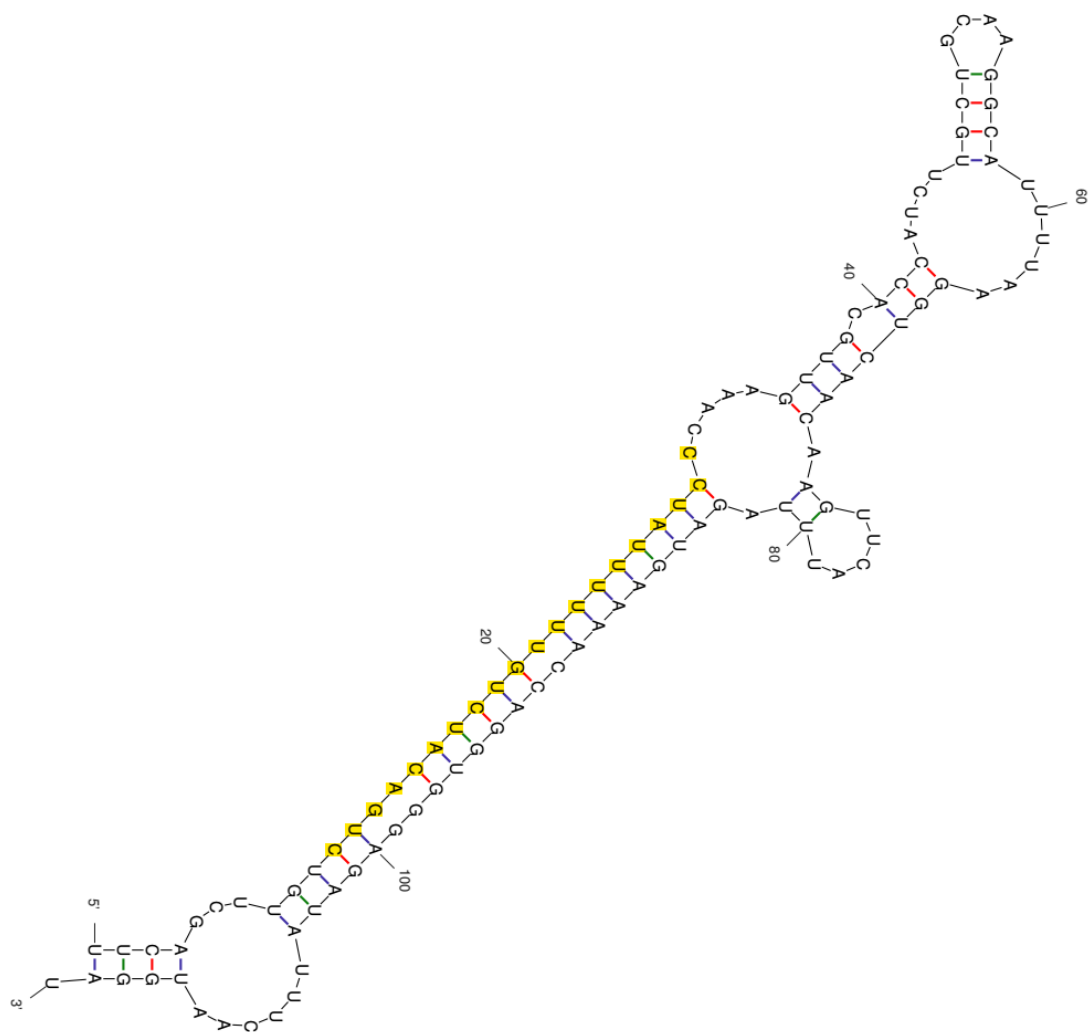

*gsi-smR24*



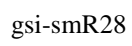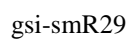

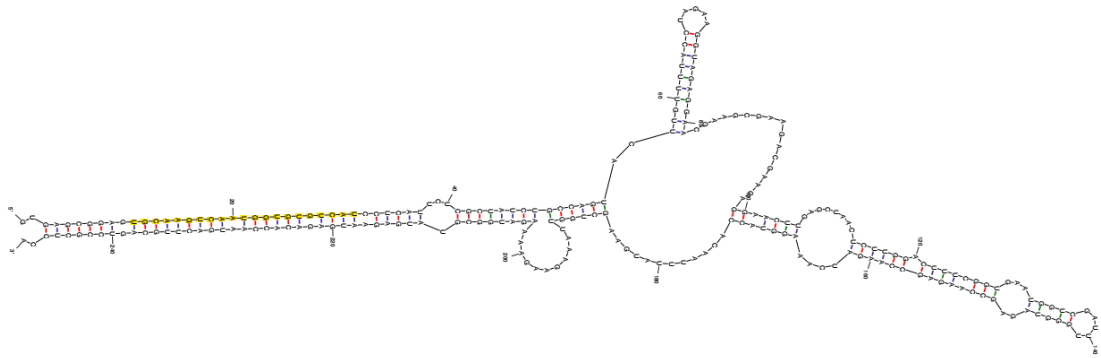

gsi-smR30

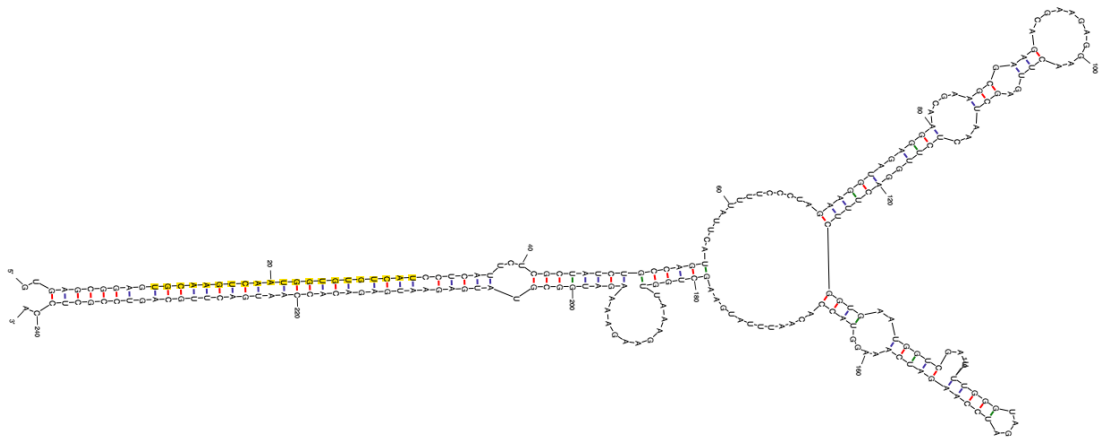

gsi-smR31

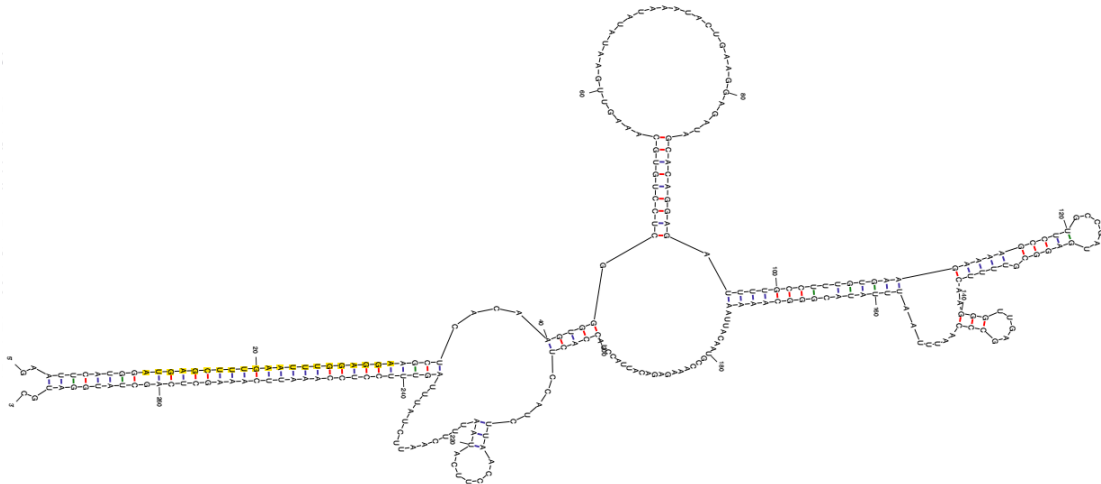

gsi-smR32

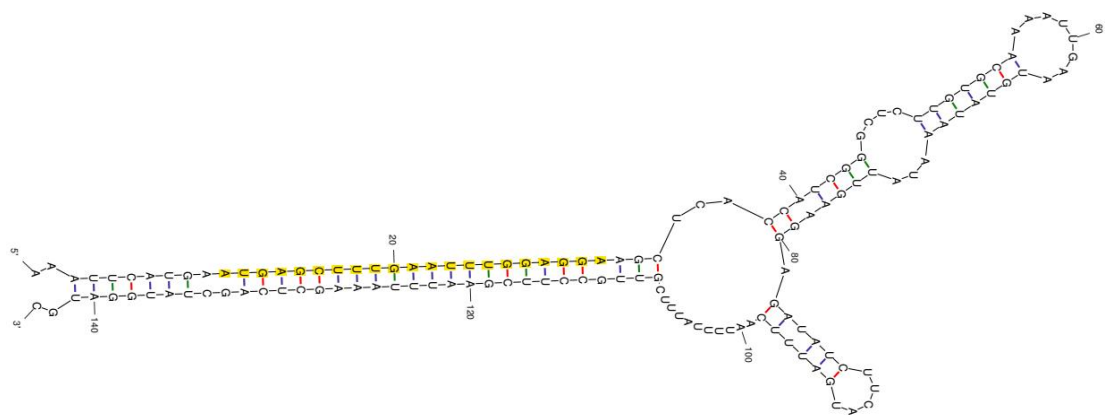

gsi-smR33

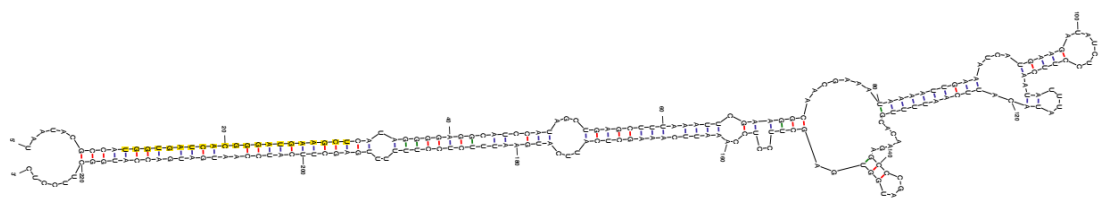

gsi-smR34

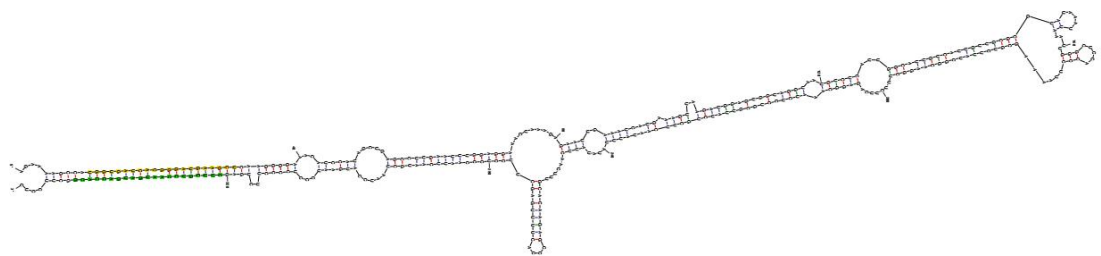

gsi-smR35

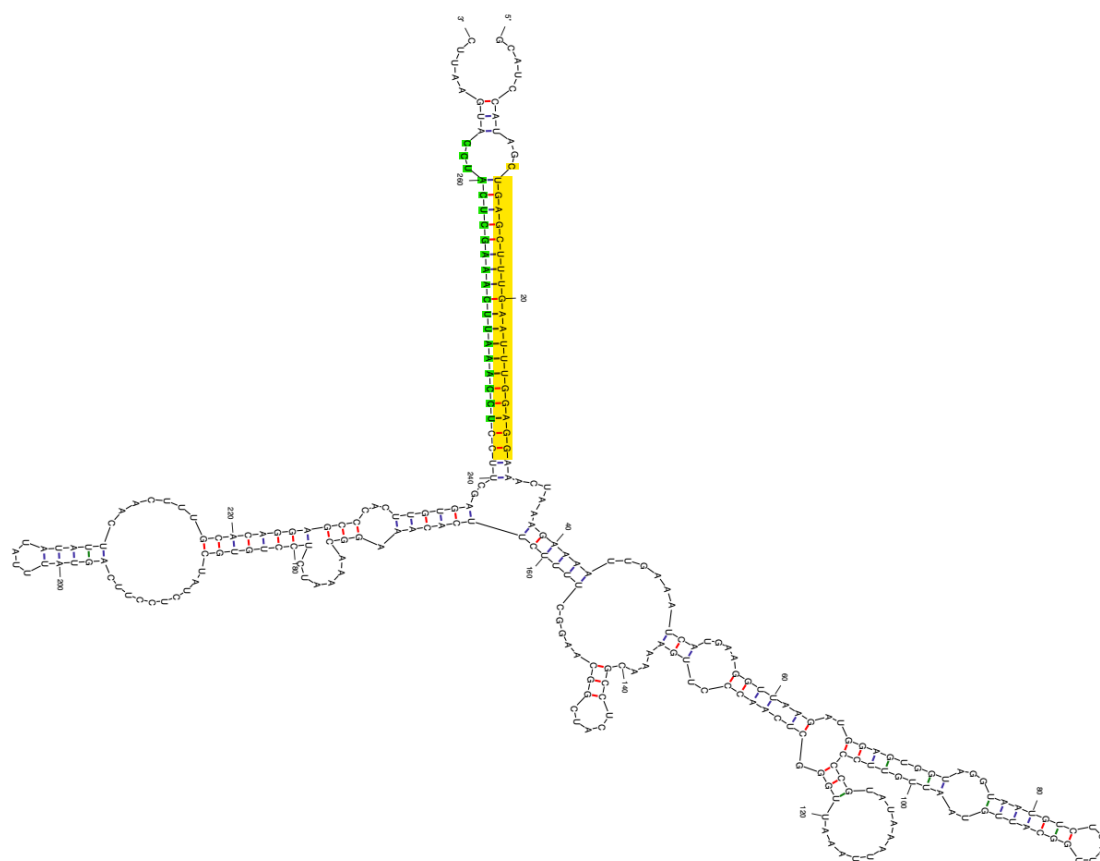

gsi-smR36

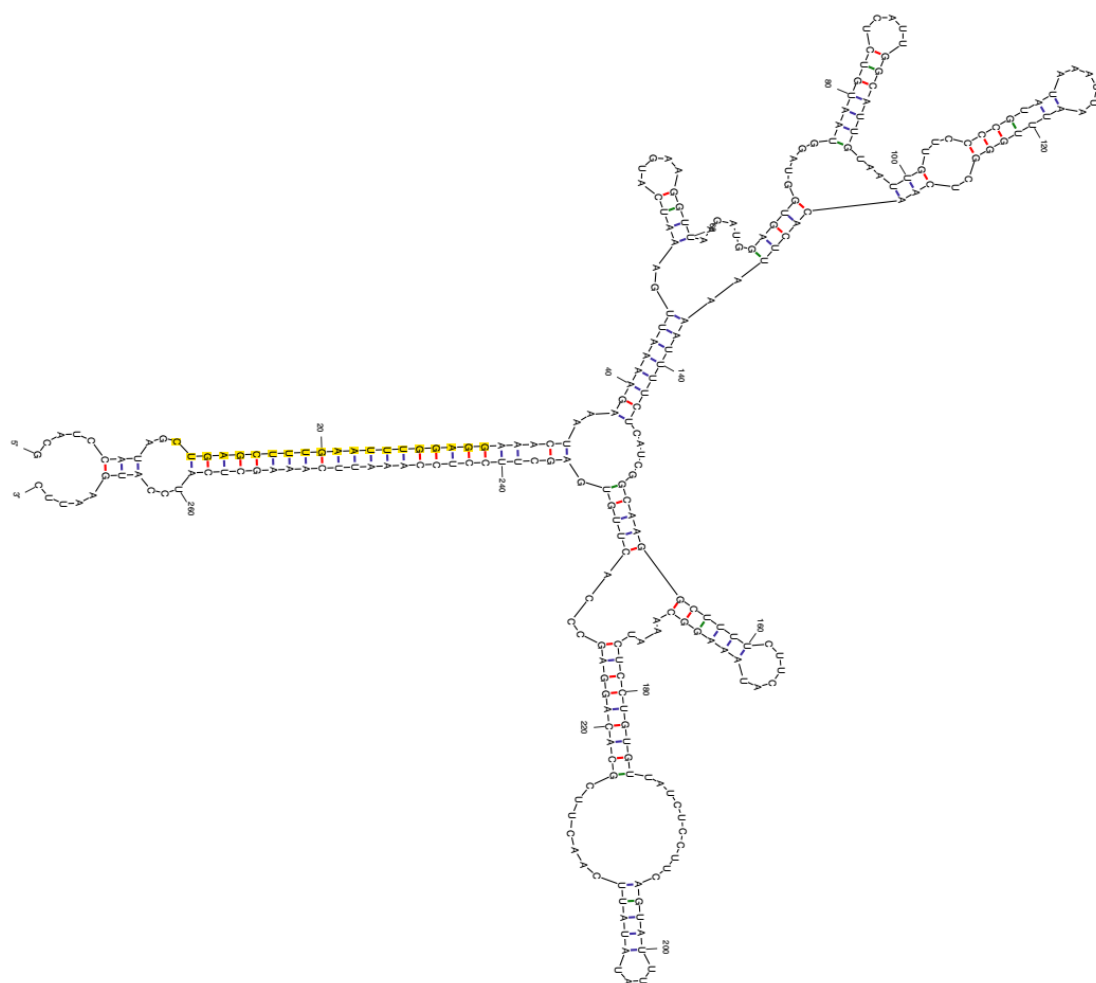

gsi-smR37



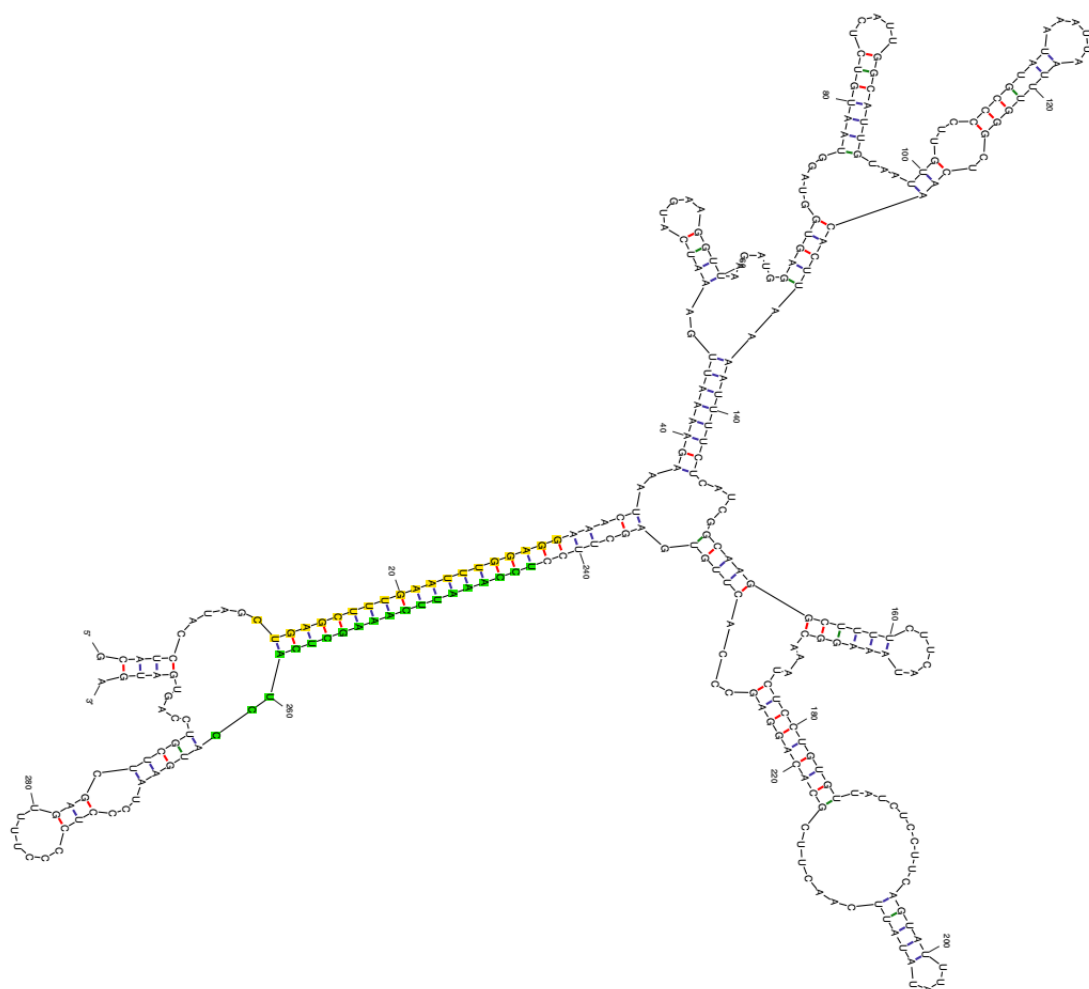

gsi-smR38

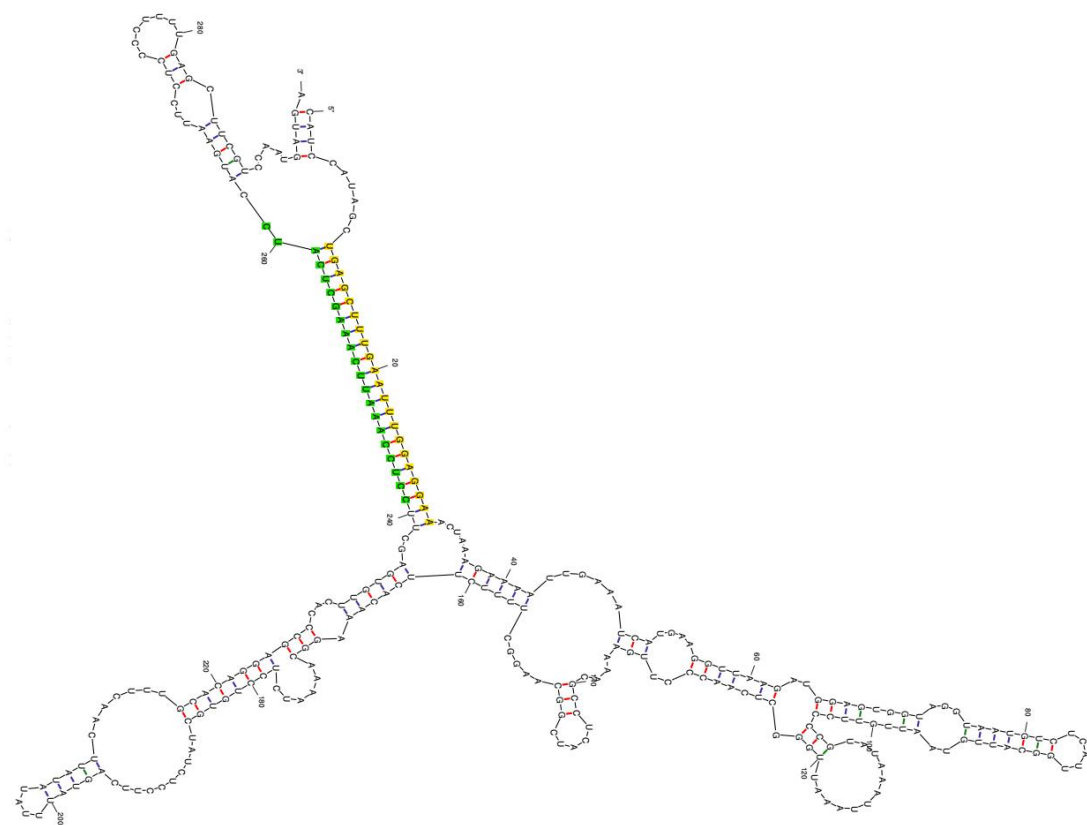

gsi-smR39

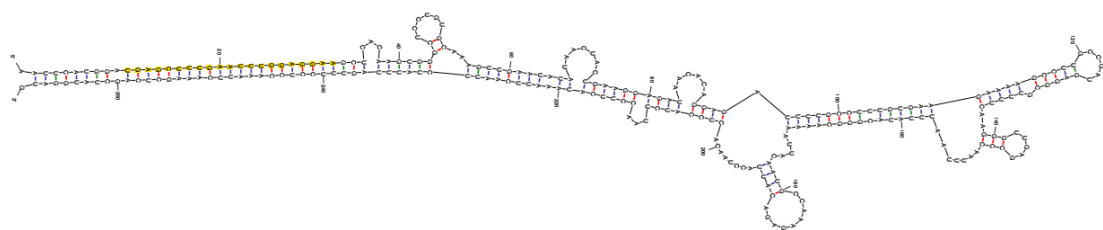

gsi-smR40

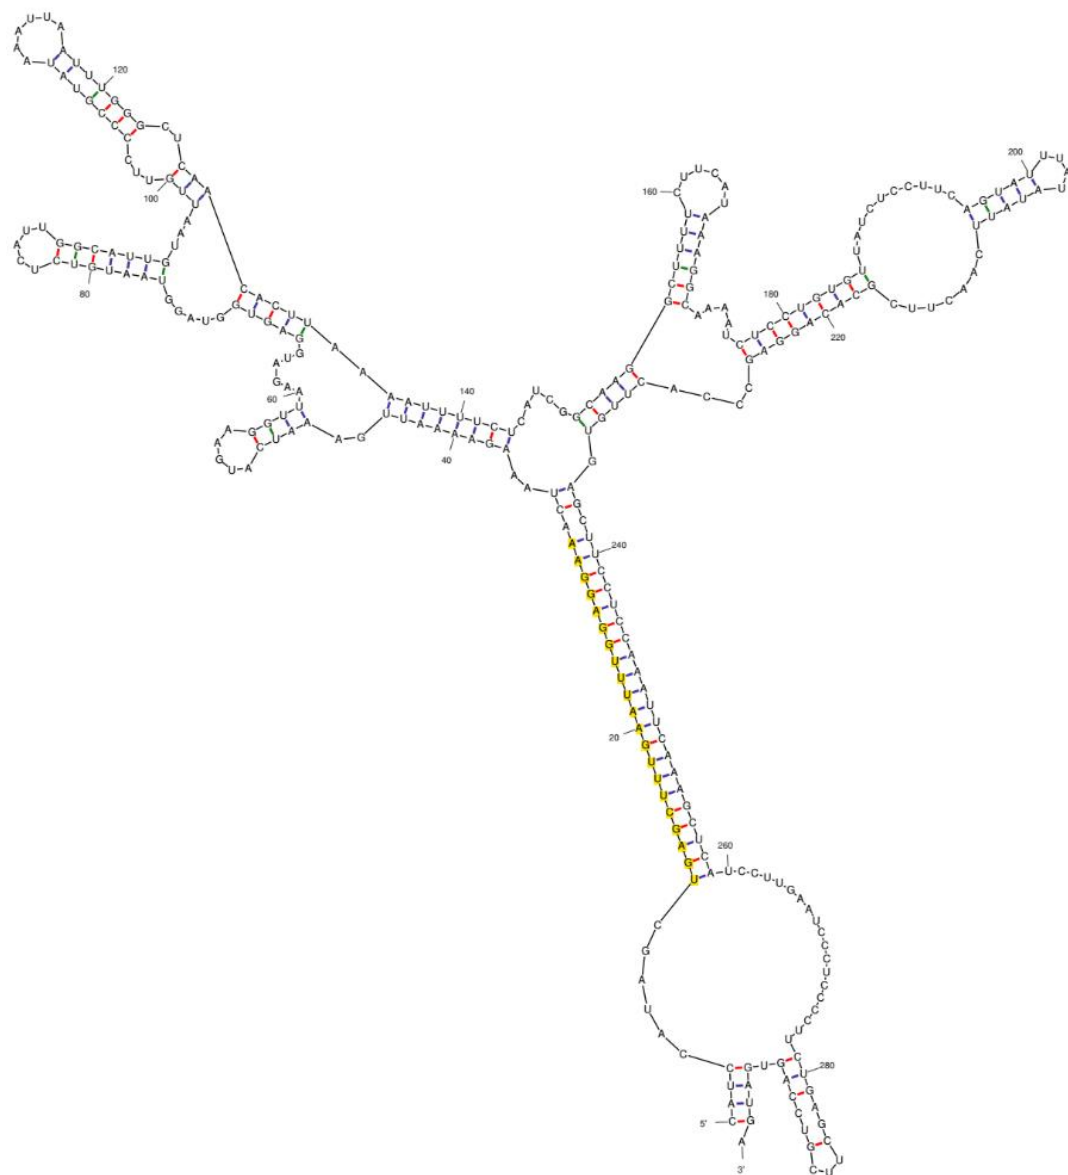

gsi-smR41

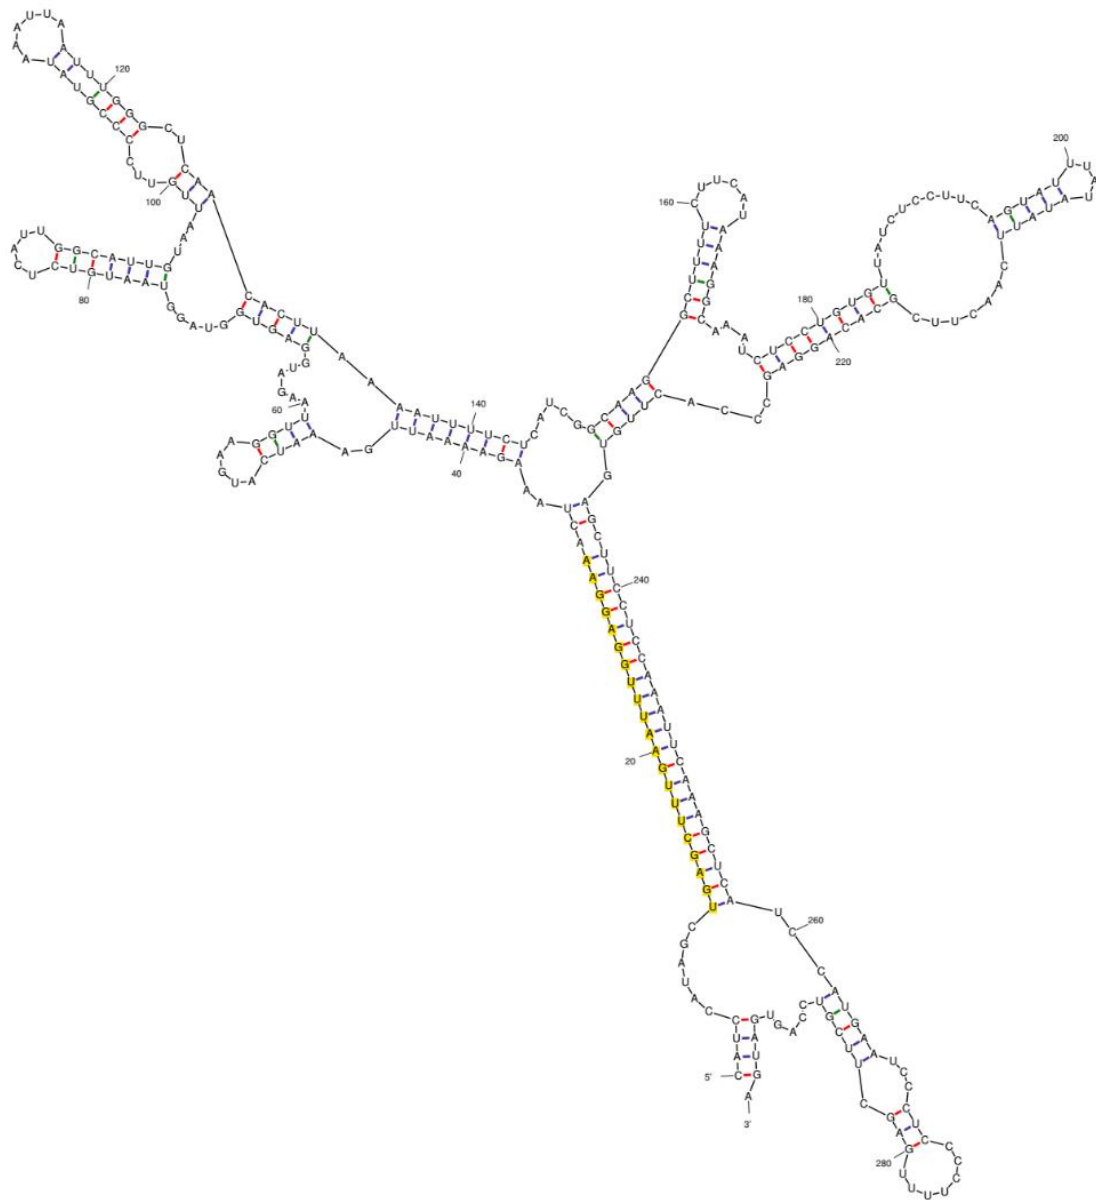

*gsi-smR42*

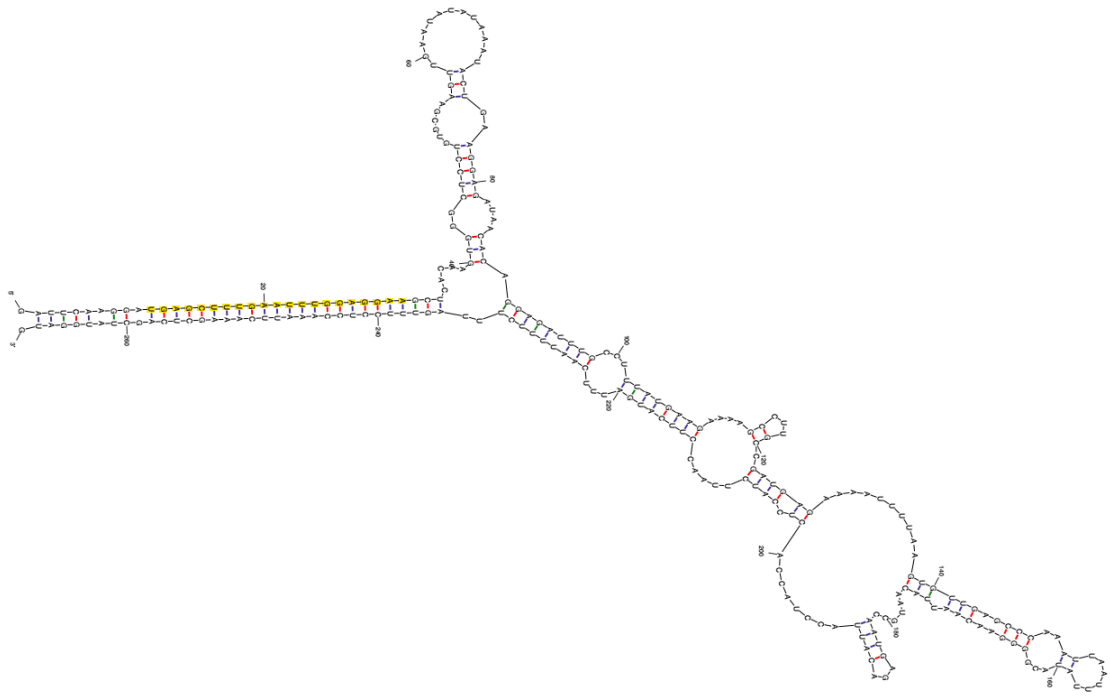

gsi-smR43

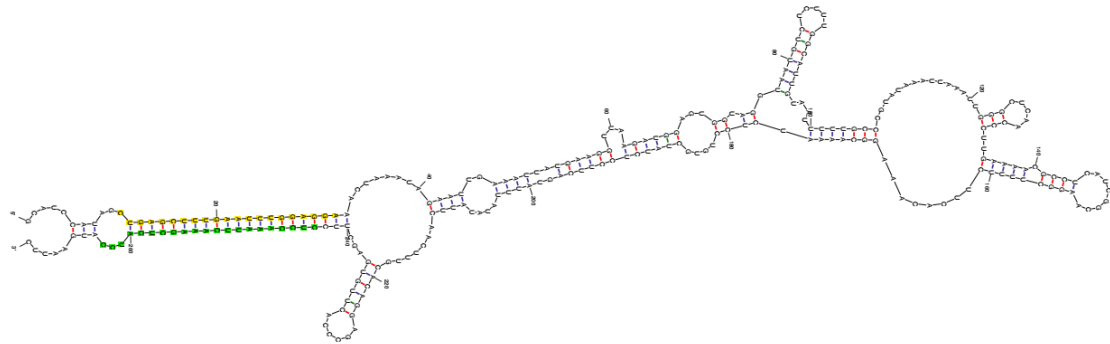

gsi-smR44

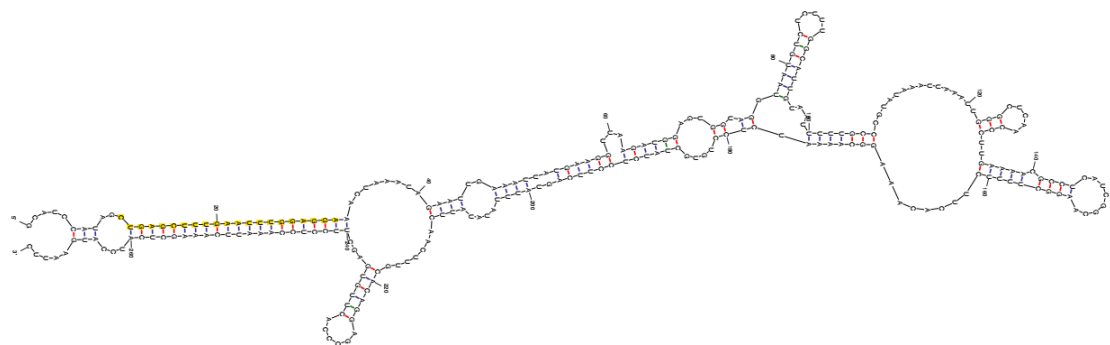

gsi-smR45

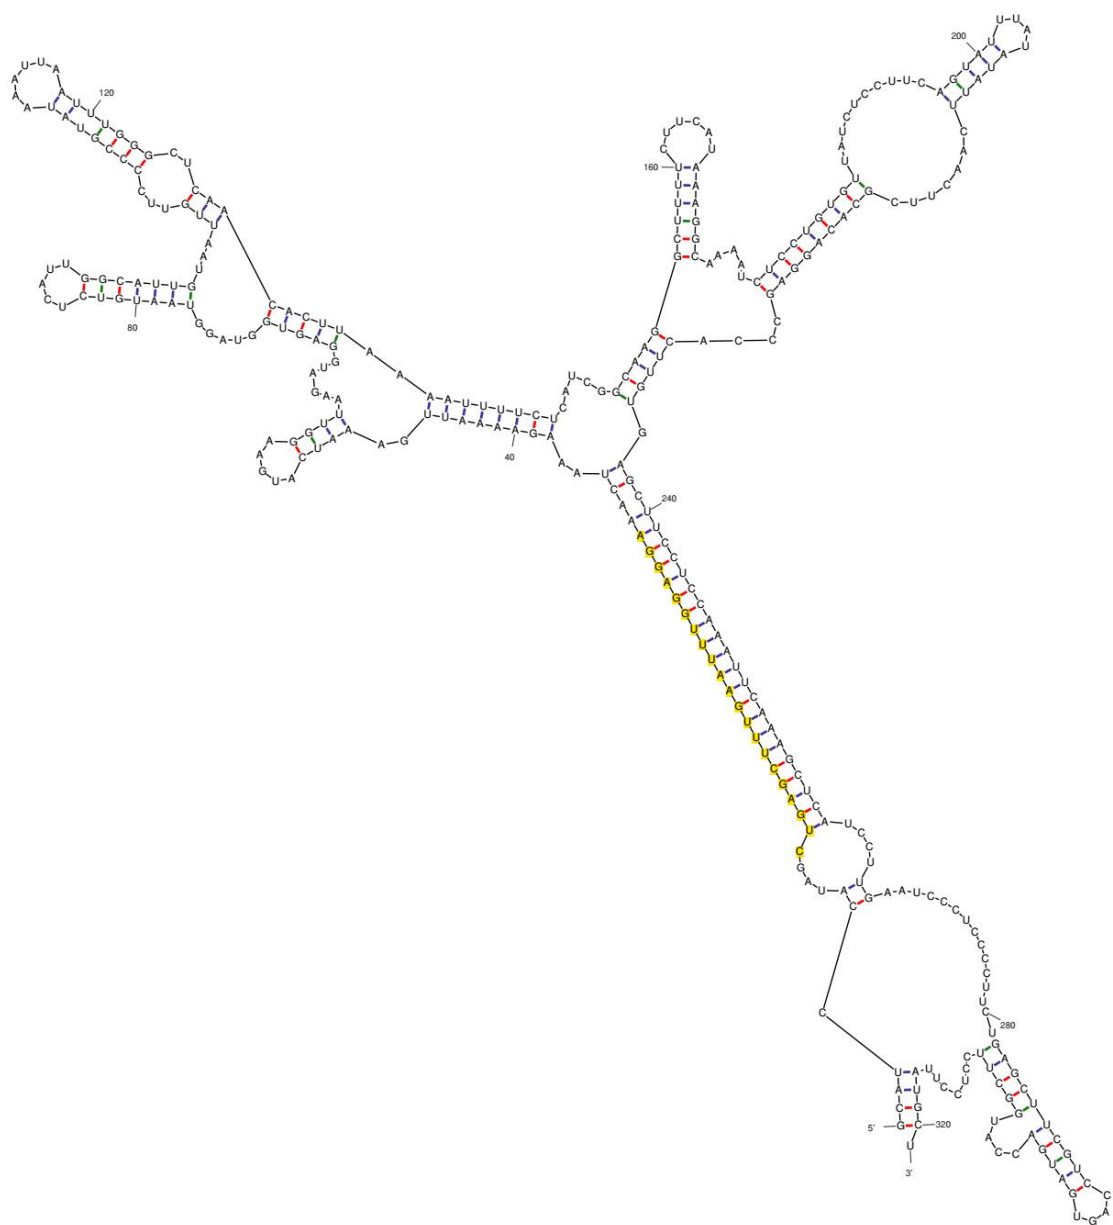

gsi-smR46

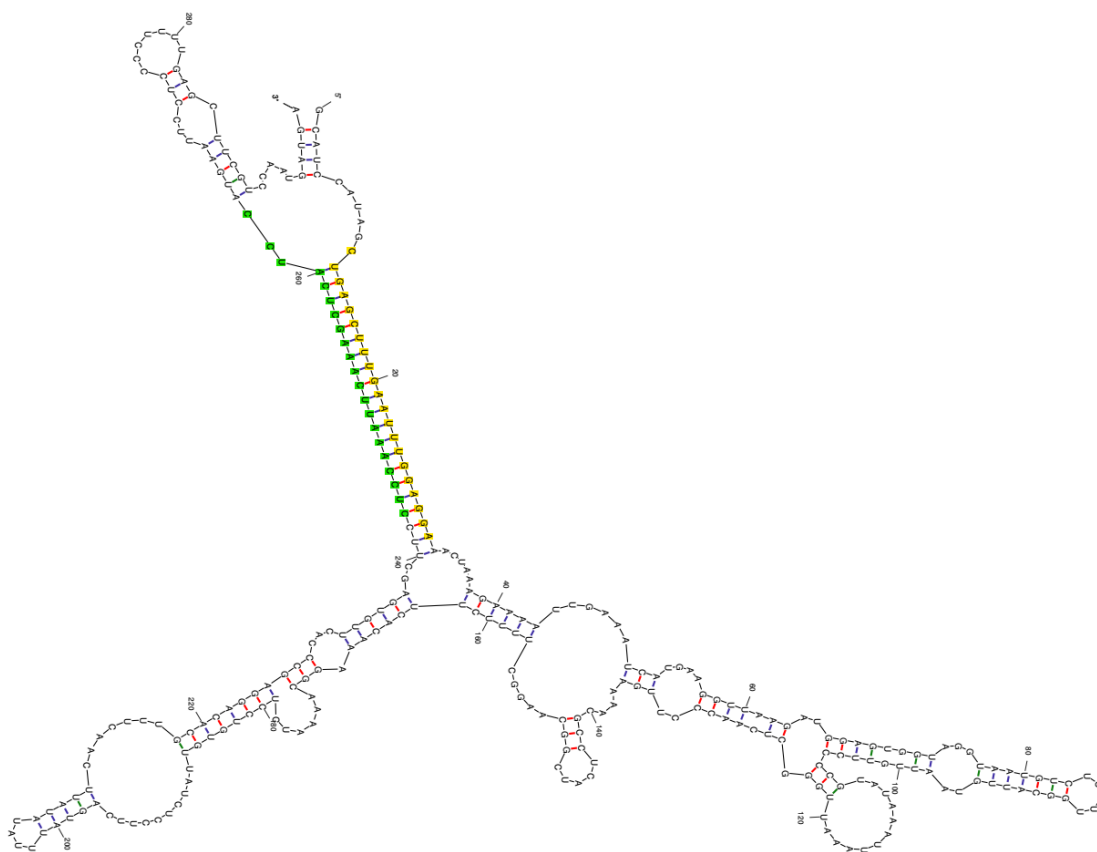

gsi-smR47

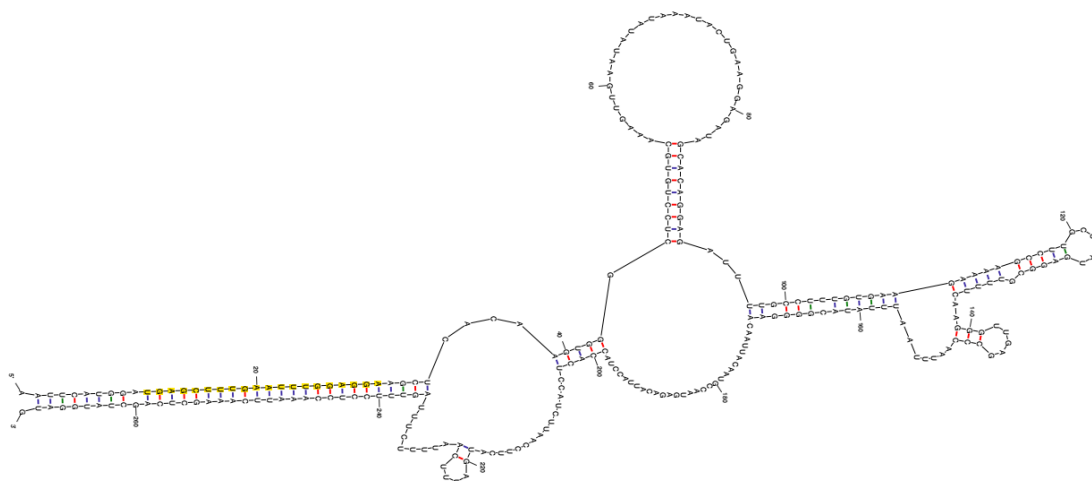

gsi-smR48

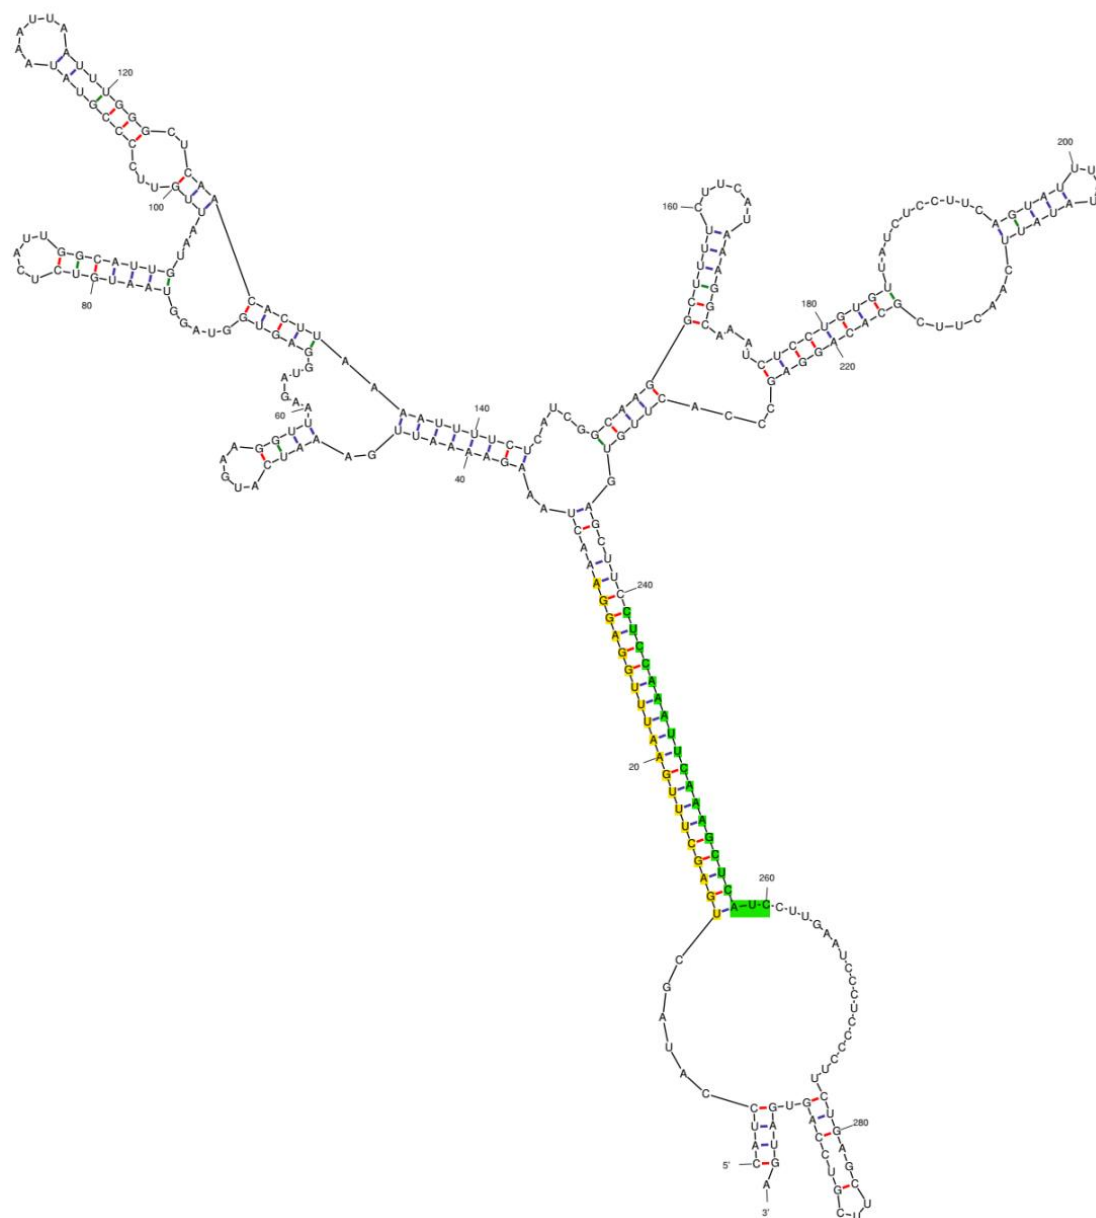

gsi-smR49



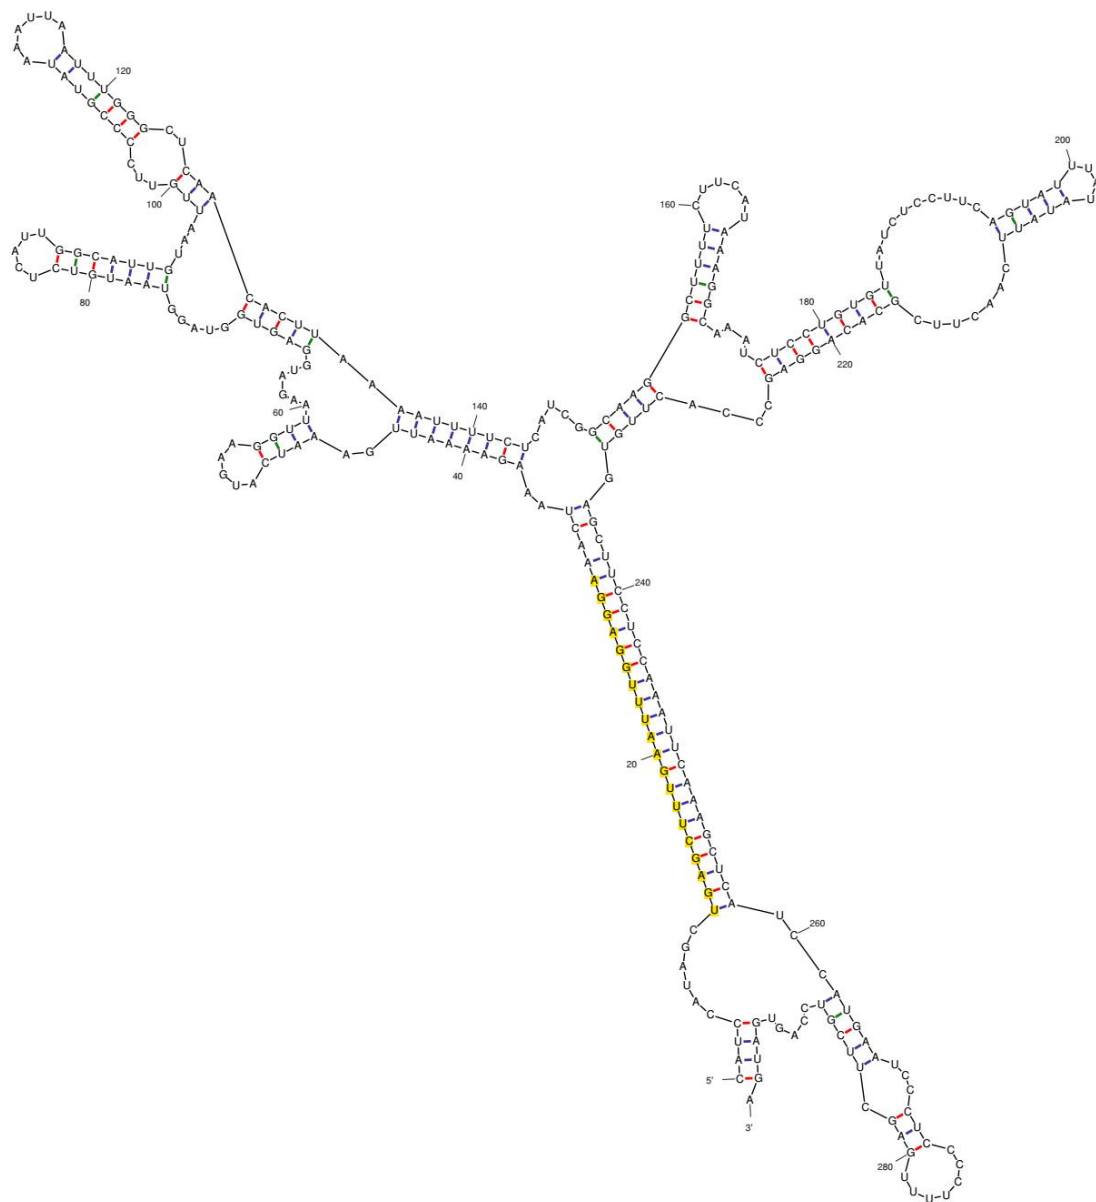

gsi-smR50

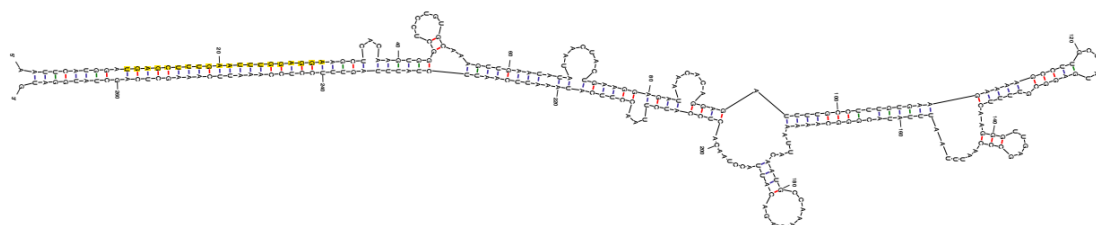

gsi-smR51

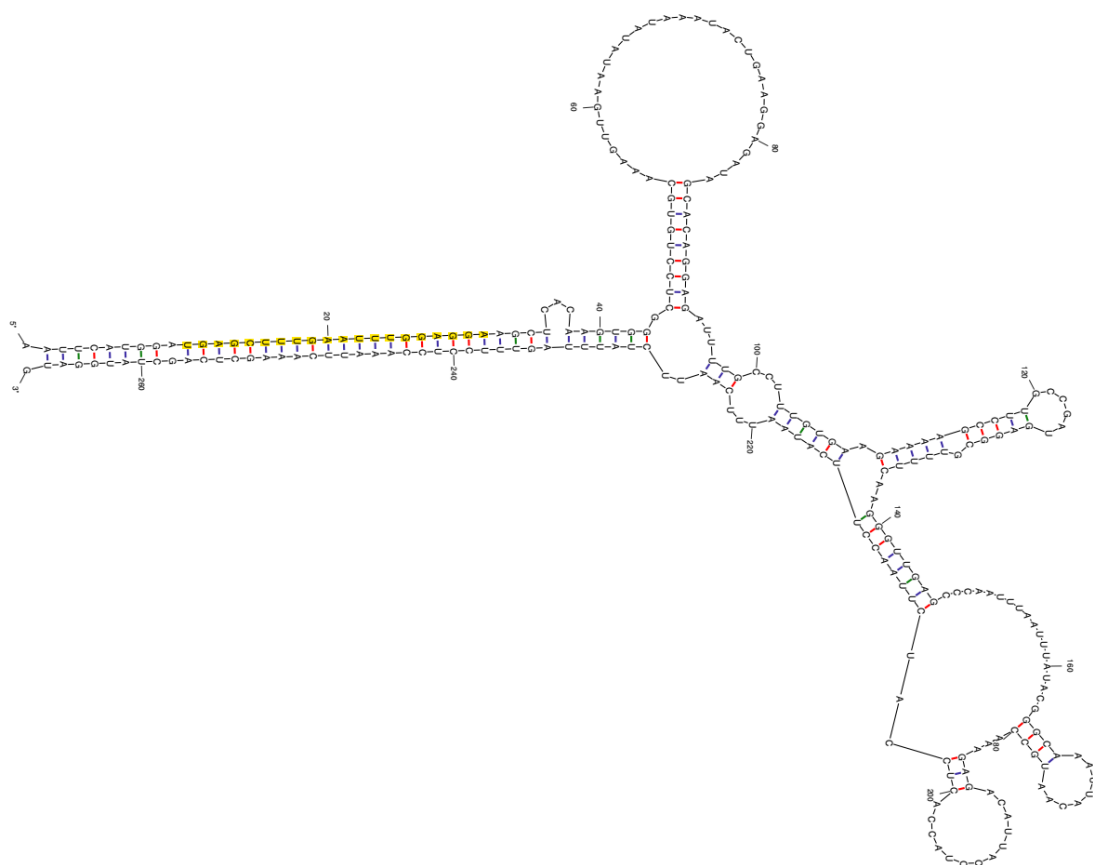

gsi-smR52

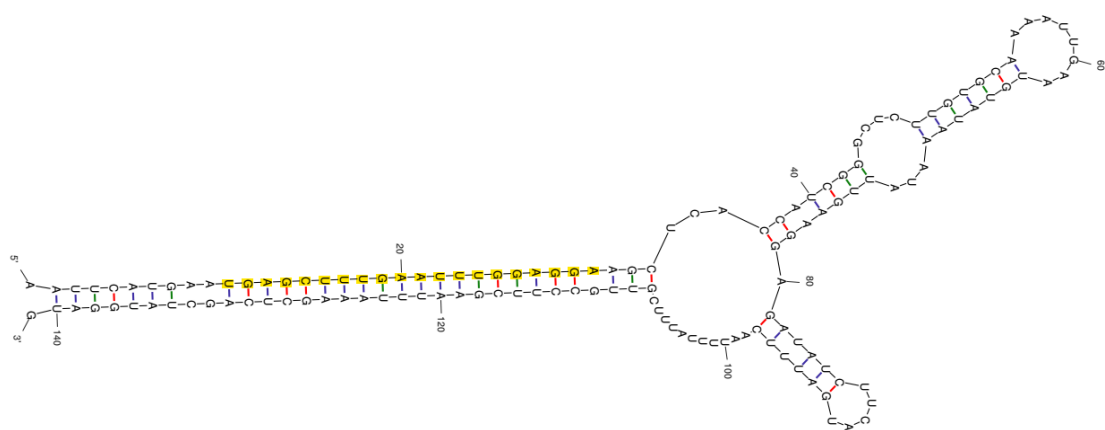

gsi-smR53

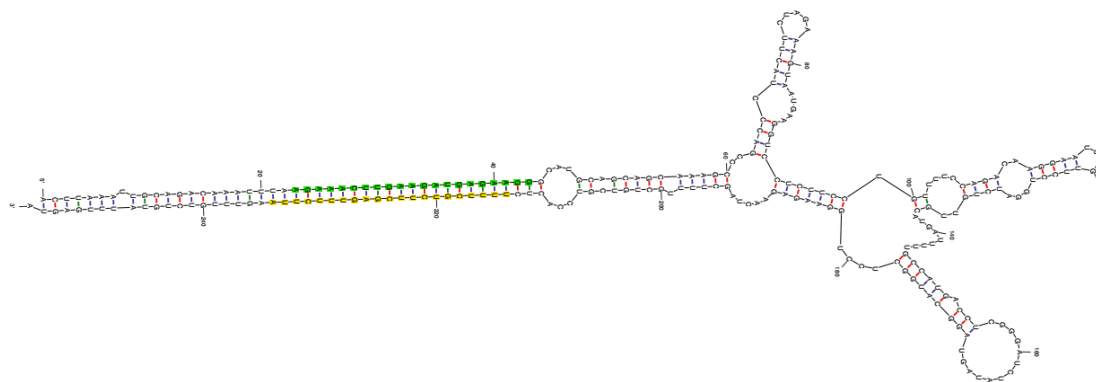

gsi-smR54

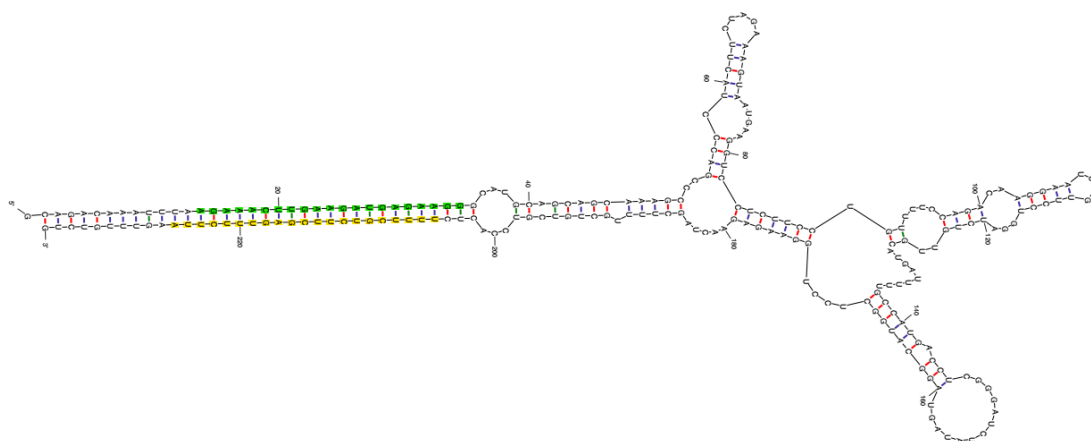

gsi-smR55

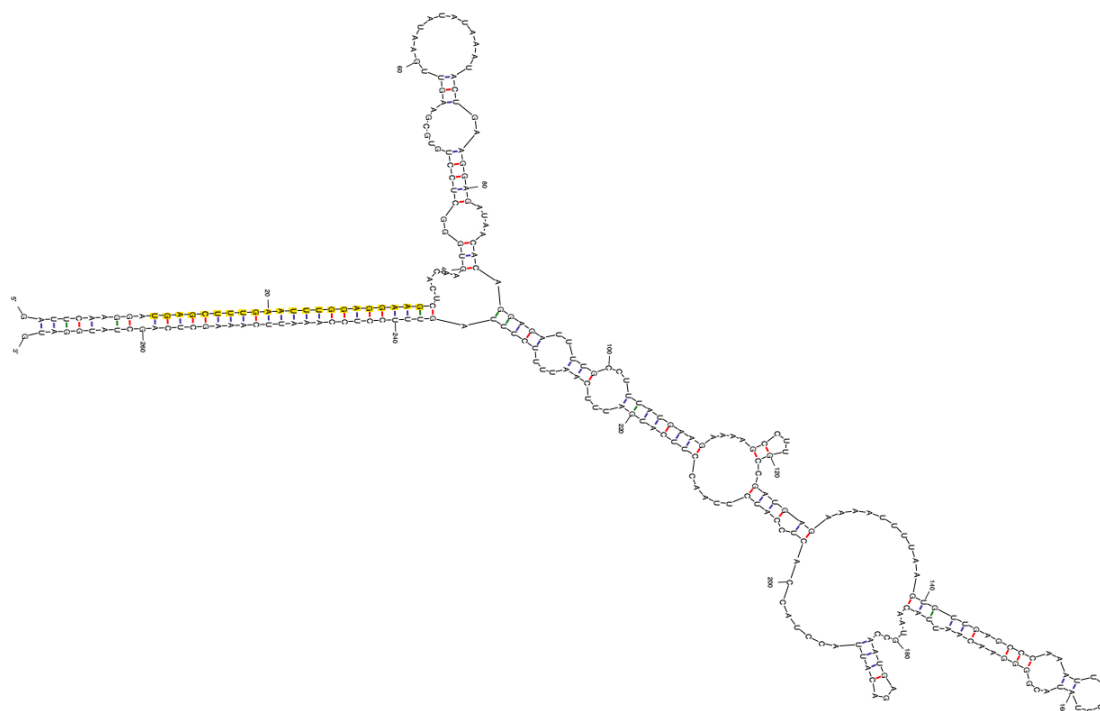

gsi-smR56

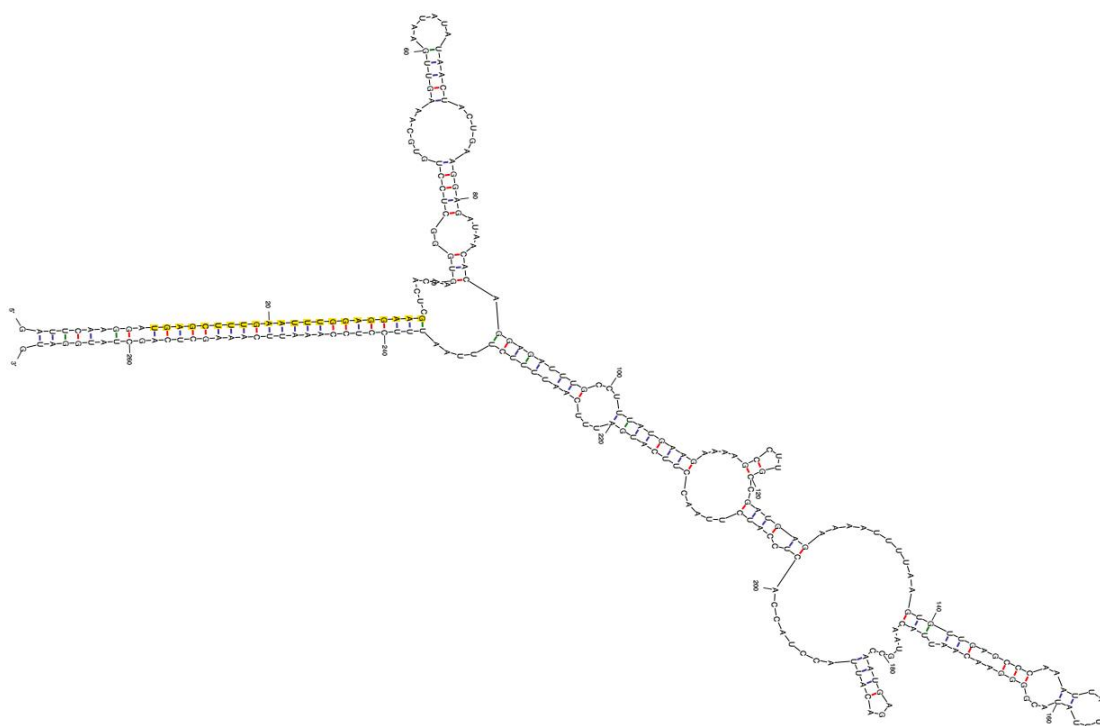

gsi-smR57

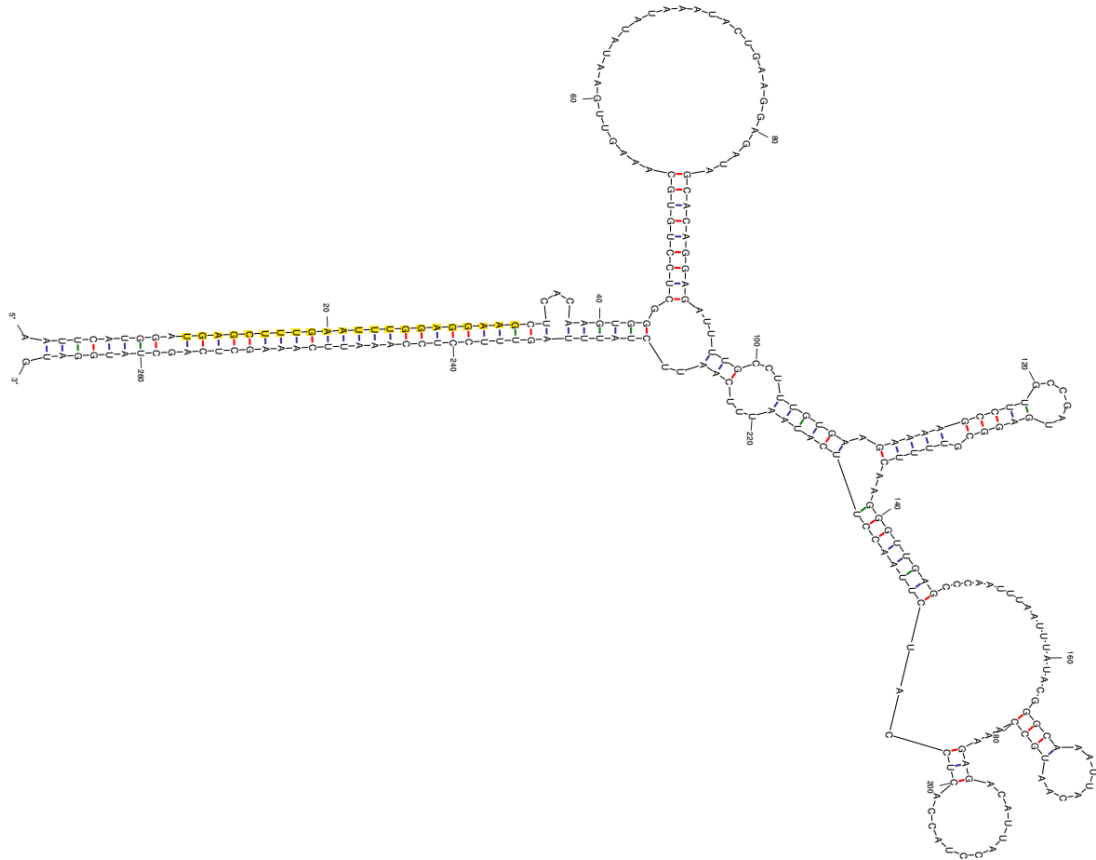

gsi-smR58

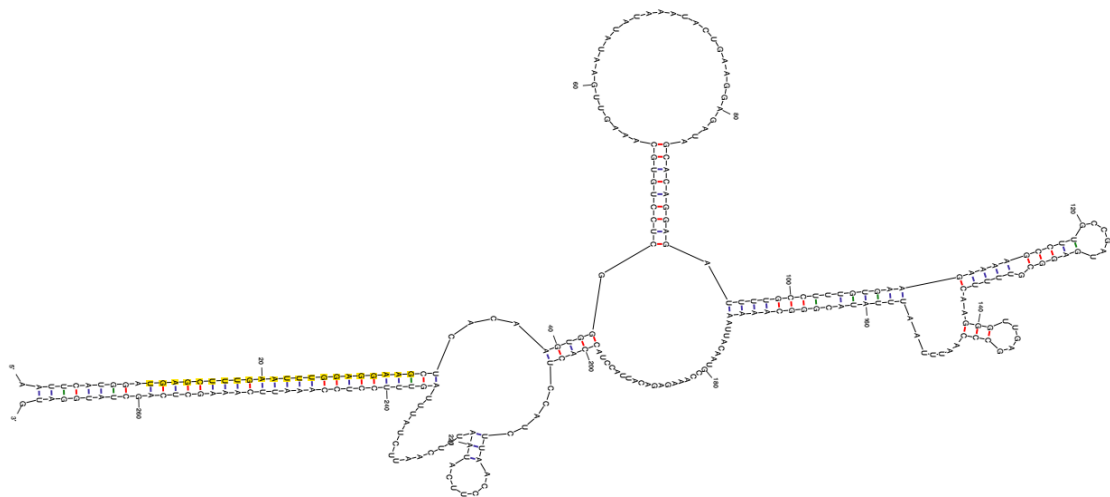

gsi-smR59

Supplementary Figure S2. Secondary structure of novel miRNAs (green represents the mature sequence of novel miRNA; yellow represents the corresponding star sequence of novel miRNA).
