# Supplementary material
Source: MDPI journal article supplement (https://www.mdpi.com/1999-4907/13/1/108)
Supplement: s1 [file s1]

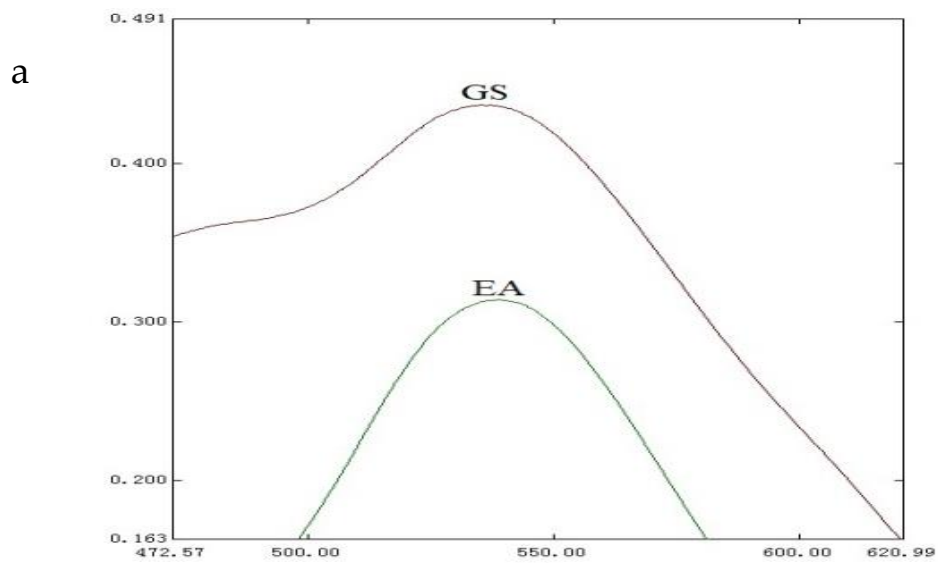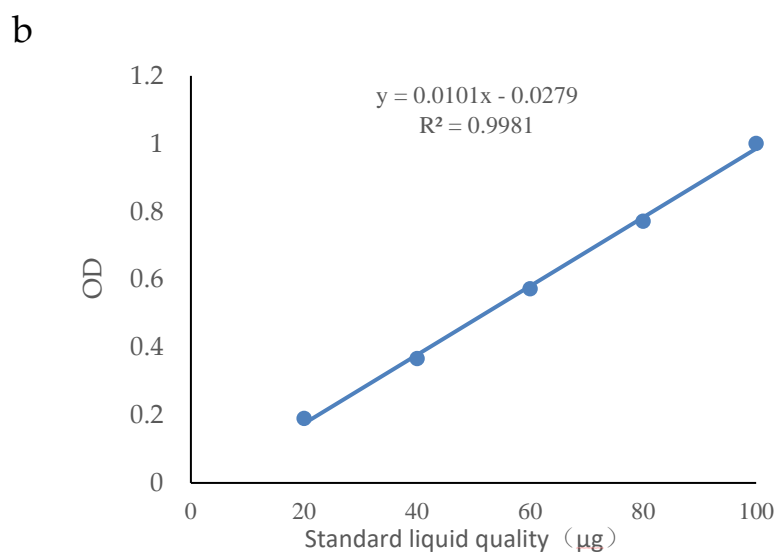

Supplementary Figure S1. The concentrations of saponins in three stages (May, July, and September) were quantified by spectrophotometry colorimetry with echinocystic acid (EA). (a) Full wavelength scanning of EA and methanol extract of pods from June to November. (b) Standard curve of echinocystic acid (EA) from 20 μg to 100 μg. Note: (a) GS, three stage samples; EA, echinocystic acid.
